# Supplementary material for: Unexpected radical mechanism in a [4+1] cycloaddition reaction
Source: Royal Society of Chemistry journal article supplement (doi:10.1039/d1nj00660f), 2021-01-01
Supplement: d1nj00660f1.pdf [file d1nj00660f1.pdf]

*Supplementary Material to the Paper entitled*

**Unexpected Radical Mechanism in a [4 + 1] Cycloaddition Reaction**

István Bors,<sup>a</sup> Mihály Purgel,<sup>b</sup> Péter Pál Fehér,<sup>c</sup> Tamás Varga,<sup>d</sup> Gábor Speier<sup>a</sup>,  
László Korecz and József Kaizer\*<sup>a</sup>

*<sup>a</sup> Research Group of Bioorganic and Biocoordination Chemistry, University of Pannonia, H-8200 Veszprém, Hungary. E-mail: kaizer@almos.uni-pannon.hu*

*<sup>b</sup> Department of Physical Chemistry, University of Debrecen, H-4032 Debrecen, Hungary.*

*<sup>c</sup> Institute of Organic Chemistry, Research Centre for Natural Sciences, H-1117 Budapest, Hungary.*

*<sup>d</sup> Department of Process Engineering, University of Pannonia, H-8200 Veszprém, Hungary.*

*[kaizer@almos.uni-pannon.hu](mailto:kaizer@almos.uni-pannon.hu)*

**General**

Schlenk-type inert gas techniques were used thorough and solvents were purified by standard methods.<sup>1</sup> UV-Vis spectra were recorded on an Agilent 8453 spectrophotometer. All infrared spectra were obtained using a ThermoNicolet Avatar 330 FT-IR. All EPR spectra were measured by a Bruker ElexSys E500 X-band spectrometer with 1 mW microwave power at 100 kHz modulation frequency. <sup>1</sup>H NMR and <sup>31</sup>P NMR spectra were recorded at 400 MHz on a Bruker Avance 400 MHz spectrometer. Chemical shifts (δ) are reported in ppm proton shifts downfield from tetramethylsilane (TMS), phosphorous shifts downfield from phosphorous acid (H<sub>3</sub>PO<sub>4</sub>). Cyclic voltammetry were carried out with a VoltaLab PST006 potentiostat. Melting points were obtained by using a calibrated melting point microscope.

**Cyclic voltammetry**

The cyclic voltammograms of 1 mM solutions of 9,10-phenanthrenequinone monoimines and 0.5 mM solutions of 2,7-disubstituted 1,3,2-oxazaphospholes

were recorded in dried and argon saturated acetonitrile solutions with 0.1 M tetrabutylammonium perchlorate as a supporting electrolyte. The reversible one electron Fc/Fc<sup>+</sup> (ferrocene/ferrocenium) couple has  $E^{0}_{1/2} = +428$  mV vs. Ag/AgCl. A three-electrode configuration composed of Pt-wire counter electrode, glassy carbon working electrode and a Ag/AgCl reference electrode. The cyclic voltammograms displays reversible oxidation waves in the case of 1,3,2-oxazaphospholes and irreversible waves in the case of imines.

## Materials

The starting materials, triphenylphosphine (A.R.) and phenanthrene (puriss) were purchased from Sigma-Aldrich and Merck respectively. Triphenylphosphine were further purified by two times recrystallization from 95% ethanol<sup>1</sup>. H-abstractor TEMPO ((2,2,6,6-tetramethyl-piperidin-1-yl)oxyl) (98%), hydroxylamine hydrochloride and methylamine 40 wt. % aqueous solution were provided by Aldrich. All solvents were purchased from Molar Chemicals. Ammonia cylinder was ordered from Messer Griesheim. All other reagents were used as received unless otherwise noted.

### *Preparation of starting compounds*

9,10-Phenanthrenequinone and 2,7-*tert*-butyl-9,10-phenanthrenequinone<sup>2</sup> were prepared from phenanthrene and 2,7-di-*tert*-butylphenanthrene by CrO<sub>3</sub> oxidation. 2,7-Dinitro-9,10-phenanthrenequinone<sup>3</sup> was prepared by nitration of 9,10-phenanthrenequinone and 2,7-dibromo-9,10-phenanthrenequinone<sup>4</sup> by the reaction between NBS (*N*-bromosuccinimide) and 9,10-phenanthrenequinone. Amino<sup>5</sup>- methylamino<sup>6</sup>- and iodosubstituted<sup>7</sup> phenanthrenequinones were prepared *via* reduction and further methylation or diazotation of 2,7-dinitro-9,10-phenanthrenequinone. Hydroxylamine hydrochloride was used for the synthesis of 9,10-phenanthrenequinone-monoxime<sup>8</sup>, methylamine for *N*-methylphenanthrenequinone and a Staudinger reagent, namely *N*-phenyliminophosphorane (prepared according to the literature), was applied to synthesize *N*-phenylphenanthrenequinone<sup>9</sup>.

*General procedure for the synthesis of 9,10-phenanthrenequinone monoimines (1a-1d).*

2,7-disubstituted derivate of phenanthrenequinone (10 mmol) were dissolved in a mixture of 30 ml  $\text{CHCl}_3$  and 60 ml ethanol.  $\text{NH}_3(\text{g})$  was bubbled through the solution at reflux temperature for two hours. After cooling yellow, needle like crystals were separated and dried in vacuum.

**R= -H** Yield: 1.55 g (75%). m.p. 165-167 °C. – FTIR (KBr)  $\text{v}/\text{cm}^{-1}$ : 3199 (m, N-H stretch), 1674 (s, C=O stretch), 1589, 1451, 1282, 1251, 1227, 1122, 1011, 942, 923, 897, 758, 714, 696, 534, 433. UV-Vis ( $\text{CH}_3\text{CN}$ ),  $\lambda_{\text{max}}/\text{nm}$  ( $\log \epsilon$ ): 213 (4.44), 257 (4.49), 265 (4.49), 314 (3.54), 393 (3.21) ( $\text{mol}^{-1} \text{dm}^3 \text{cm}^{-1}$ ).

**R= -tBu** Yield: 2.31 g (72%). m.p. 174-175 °C. FTIR (KBr)  $\text{v}/\text{cm}^{-1}$ : 3199 (m, N-H stretch), 3077 (w, C-H stretch), 2958 (s, C-H stretch), 1669 (s, C=O stretch). UV-Vis ( $\text{CH}_3\text{CN}$ ),  $\lambda_{\text{max}}/\text{nm}$  ( $\log \epsilon$ ): 213 (4.67), 265 (4.86), 274 (4.83), 315 (3.74), 420 (3.53) ( $\text{mol}^{-1} \text{dm}^3 \text{cm}^{-1}$ ).

**R= -NO<sub>2</sub>** Yield: 1.95 g (66%). m.p. 291-293 °C. FTIR (KBr)  $\text{v}/\text{cm}^{-1}$ : 3211 (m, N-H stretch), 3166, 1674 (s, C=O stretch), 1516, 1348. UV-Vis ( $\text{CH}_3\text{CN}$ ),  $\lambda_{\text{max}}/\text{nm}$  ( $\log \epsilon$ ): 204 (4.36), 224 (4.36), 296 (4.41), 369 (3.80) ( $\text{mol}^{-1} \text{dm}^3 \text{cm}^{-1}$ ).

**R= -Br** Yield: 2.88 g (79%). m.p. 235-237 °C. FTIR (KBr)  $\text{v}/\text{cm}^{-1}$ : 3199 (m, N-H stretch), 1677 (s, C=O stretch), 1077 (m,  $\text{C}_{\text{arom}}\text{-Br}$  stretch), 1033 (w,  $\text{C}_{\text{arom}}\text{-Br}$  stretch). UV-Vis( $\text{CH}_3\text{CN}$ ),  $\lambda_{\text{max}}/\text{nm}$  ( $\log \epsilon$ ): 191 (4.42), 213 (4.41), 276 (4.65), 411 (3.39) ( $\text{mol}^{-1} \text{dm}^3 \text{cm}^{-1}$ ).

*General procedure for the synthesis of 2,7-disubstituted 2,3-dihydro-2,2,2-triphenylphenanthro[9,10-]1,3,2λ<sup>5</sup>-oxazaphospholes. (4a-d).*

In an argon flushed Schlenk-tube 2 mmol of 2,7-substituted 9,10-phenanthrenequinone monoimine and 0.53 g (2 mmol) triphenylphosphine were dissolved in 10 ml argon saturated  $\text{CH}_3\text{CN}$  and refluxed for two hours. After cooling the precipitate was filtered off under argon and dried in vacuum.

**R= -H** Yield: 0.58 g (62%). m.p.153-155°C (benzene/hexane). FTIR (KBr)  $\nu/\text{cm}^{-1}$ : 3383 (m, N-H stretch), 3050, 1583, 1434, 1396, 1363, 1350, 1286, 1203, 1136, 1103, 763, 717, 694. MS (70eV):  $m/z(\%)$  469 ( $M^+$ , 30), 392 (8), 277 (22), 262 (100), 183 (35), 108 (20).  $^1\text{H}$  NMR ( $\text{CDCl}_3$ ):  $\delta = 7.3$  (br).  $^{31}\text{P}$  NMR ( $\text{C}_6\text{D}_6$ ):  $\delta = -31.4$ ; ( $\text{CD}_2\text{Cl}_2$ )  $-28.0$ .<sup>10</sup> UV-Vis ( $\text{CH}_3\text{CN}$ ),  $\lambda_{\text{max}}/\text{nm}$  ( $\log \epsilon$ ): 260 (4.92), 339 (4.37), 339 (3.73) ( $\text{mol}^{-1} \text{dm}^3 \text{cm}^{-1}$ ).

**R= -tBu** Yield: 0.64 g (55%). m.p. 258-261°C (mother liquor). FTIR (KBr)  $\nu/\text{cm}^{-1}$ : 3452 (m, N-H stretch), 3051, 2954 (s, C-H stretch), 2905 (m, C-H stretch), 2858 (m, C-H stretch), 1612, 1586, 1435, 1365, 1306, 1187, 1110. UV-Vis ( $\text{CH}_3\text{CN}$ ),  $\lambda_{\text{max}}/\text{nm}$  ( $\log \epsilon$ ): 262 (4.64), 274 (4.61), 335 (3.95), 413 (3.48), 526 (3.13) ( $\text{mol}^{-1} \text{dm}^3 \text{cm}^{-1}$ ).

**R= -NO<sub>2</sub>** Yield: 0.61 g (55%). m.p. 134-135°C ( $\text{CH}_3\text{CN}$ ). FTIR (KBr)  $\nu/\text{cm}^{-1}$ : 3419 (m, N-H stretch), 3314 (m, stretch) 1602 (m, stretch), 1508 (s, stretch), 1434 (s, stretch), 1341 (s, stretch). UV-Vis ( $\text{CH}_3\text{CN}$ ),  $\lambda_{\text{max}}/\text{nm}$  ( $\log \epsilon$ ): 322 (4.53), 540 (3.30) ( $\text{mol}^{-1} \text{dm}^3 \text{cm}^{-1}$ ).

**R= -Br** Yield: 0.72 g (57%). m.p. 214-216 °C (mother liquor). FTIR (KBr)  $\nu/\text{cm}^{-1}$ : 3407 (m, N-H stretch), 3052, 1618, 1588, 1414, 1366, 1311, 1086, 1073 (m,  $\text{C}_{\text{arom}}\text{-Br}$  stretch), 1057, 1025, 993. UV-Vis( $\text{CH}_3\text{CN}_{(\text{Ar})}$ ),  $\lambda_{\text{max}}/\text{nm}$  ( $\log \epsilon$ ): 268 (4.54), 282 (4.46), 346 (3.88), 414 (3.30), 500 (2.89), 536 (2.87) ( $\text{mol}^{-1} \text{dm}^3 \text{cm}^{-1}$ ).

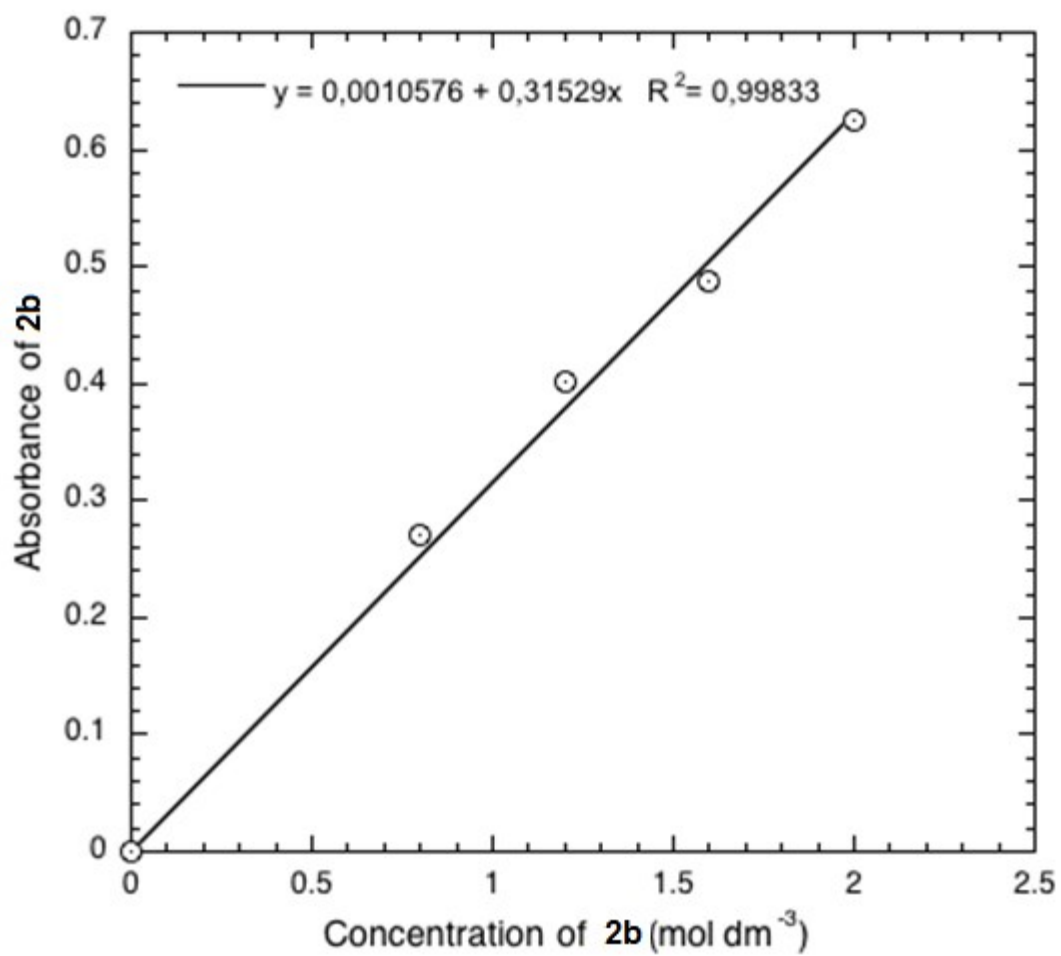

**Fig. S1** Determination of the molar absorptivity of **2b**<sup>•</sup> using TEMPO as H-abstractor.  $\lambda_{\text{max}} = 488 \text{ nm}$ ,  $\epsilon = 3154 \text{ Lmol}^{-1}\text{cm}^{-1}$ .

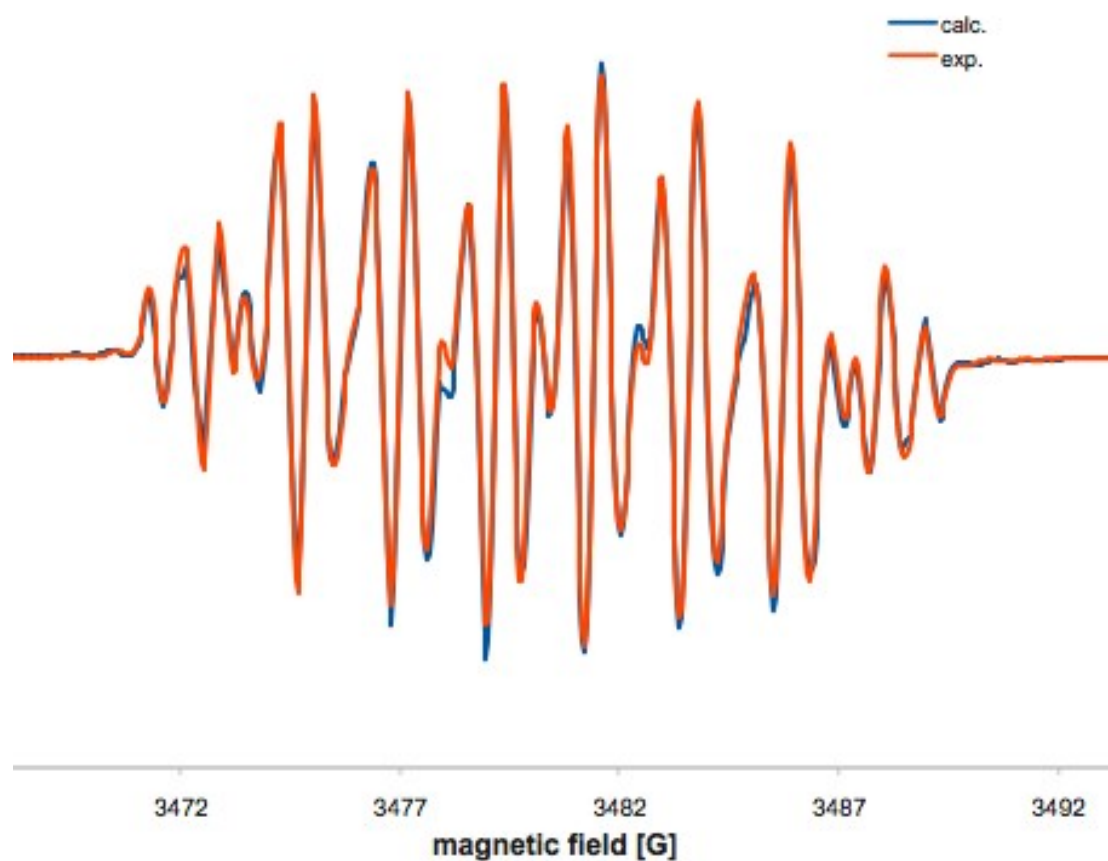

|          | 2.0039 | 2.0033 |
|----------|--------|--------|
| [MHz]    | [G]    | [G]    |
| -18.0239 | -6.44  | 6.59   |
| 9.9955   | 3.56   | 1.04   |
| -6.8290  | -2.44  | 2.31   |
| -6.3920  | -2.28  | 2.20   |
| -3.1823  | -1.14  | 2.13   |
| -2.7653  | -0.99  | 0.79   |
| 2.3713   | 0.84   | 0.79   |
|          |        | 0.70   |
|          |        | 0.15   |

**Fig. S2.** The EPR spectrum and calculated data of **2a<sup>•</sup>** (**3a<sup>•</sup>**). tBu; [**2a**] = [PPh<sub>3</sub>] = 0.5 mM, 25°C.

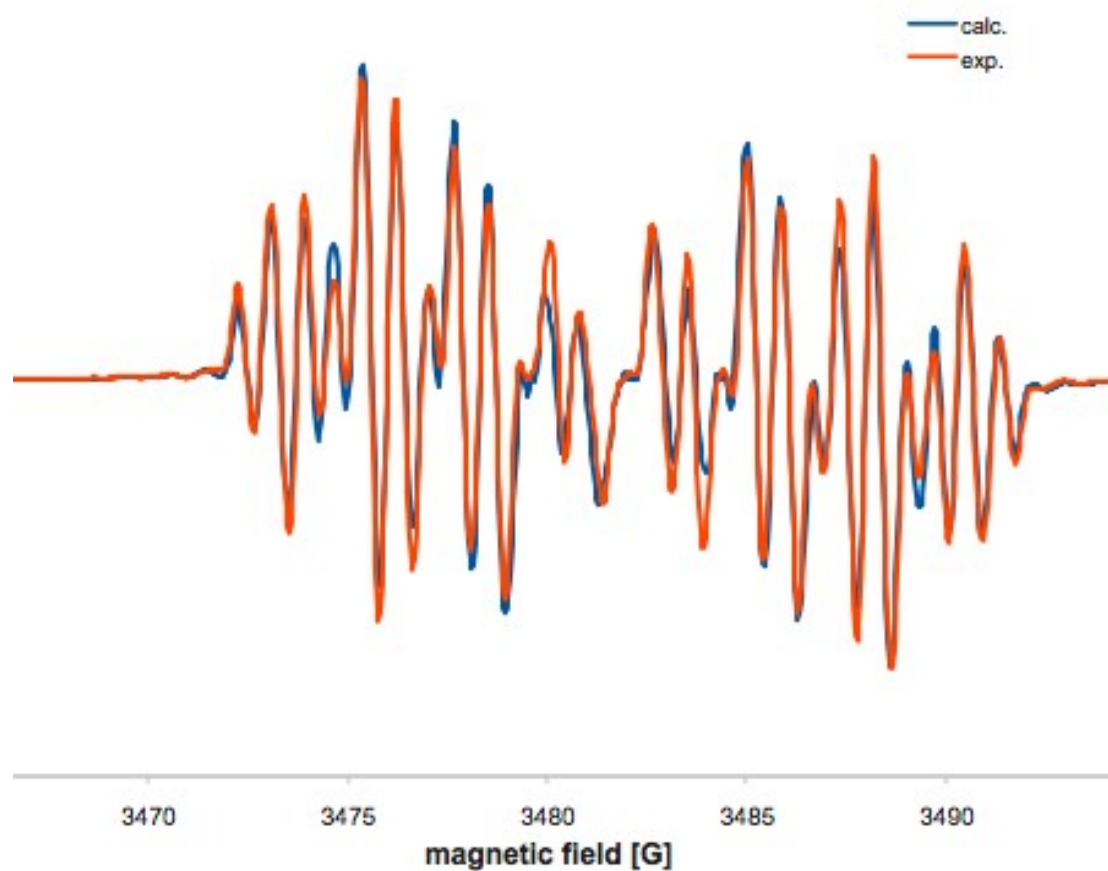

| <b>g</b>             | 2.0038  |       | 2.0033 | 2.0032 |
|----------------------|---------|-------|--------|--------|
|                      | [MHz]   | [G]   | [G]    |        |
| <b>a<sub>P</sub></b> | -       | -7.79 | 7.35   | 7.22   |
| <b>a<sub>N</sub></b> | 17.5172 | 6.26  | 1.04   | 1.05   |
| <b>a<sub>H</sub></b> | -6.0201 | -2.15 | 2.52   | 2.59   |
| <b>a<sub>H</sub></b> | -5.5927 | -2.00 | 2.35   | 2.35   |
| <b>a<sub>H</sub></b> | -2.8469 | -1.02 | 2.25   | 2.23   |
| <b>a<sub>H</sub></b> | -2.6189 | -0.94 | 0.91   |        |
| <b>a<sub>H</sub></b> | 2.2736  | 0.81  | 0.85   |        |
| <b>a<sub>H</sub></b> | -1.5625 | -0.56 | 0.72   |        |

**Fig. S3** The EPR spectrum of **2c<sup>•</sup> (3c<sup>•</sup>) Br**; **[2c] = [PPh<sub>3</sub>] = 0.5 mM, 25°C.**

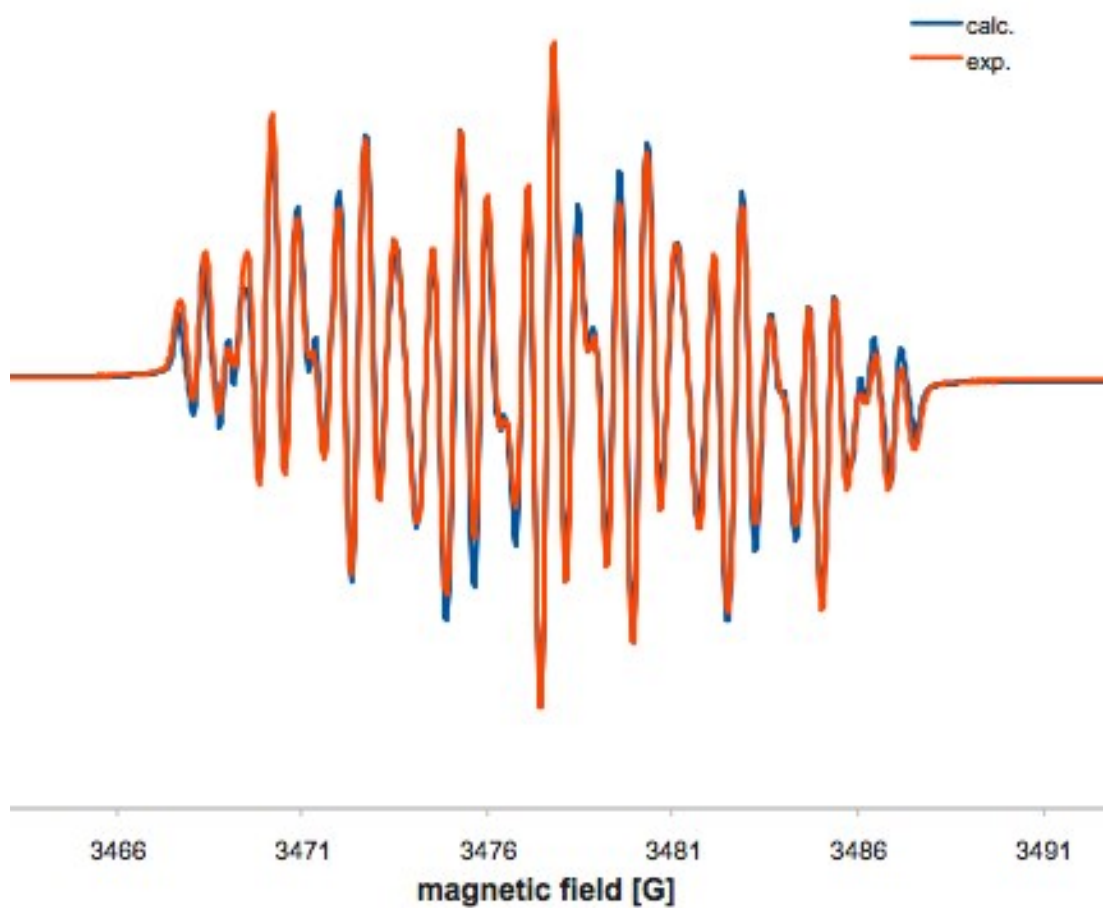

| G = 2.0039 |       | 2.0034 |
|------------|-------|--------|
| [MHz]      | [G]   | [G]    |
| -20.4897   | -7.32 | 7.59   |
| 11.6523    | 4.16  | 1.30   |
| -7.39      | -2.64 | 3.30   |
| -4.4005    | -1.57 | 1.81   |
| -4.2085    | -1.50 | 1.74   |
| 2.2432     | 0.80  | 1.02   |
| -1.4004    | -0.50 | 0.73   |
|            |       | 0.64   |

**Fig. S4** The EPR spectrum of  $2d^{\bullet}$  ( $3d^{\bullet}$ )  $NO_2$ ;  $[2d] = [PPh_3] = 0.5$  mM,  $25^{\circ}C$ .



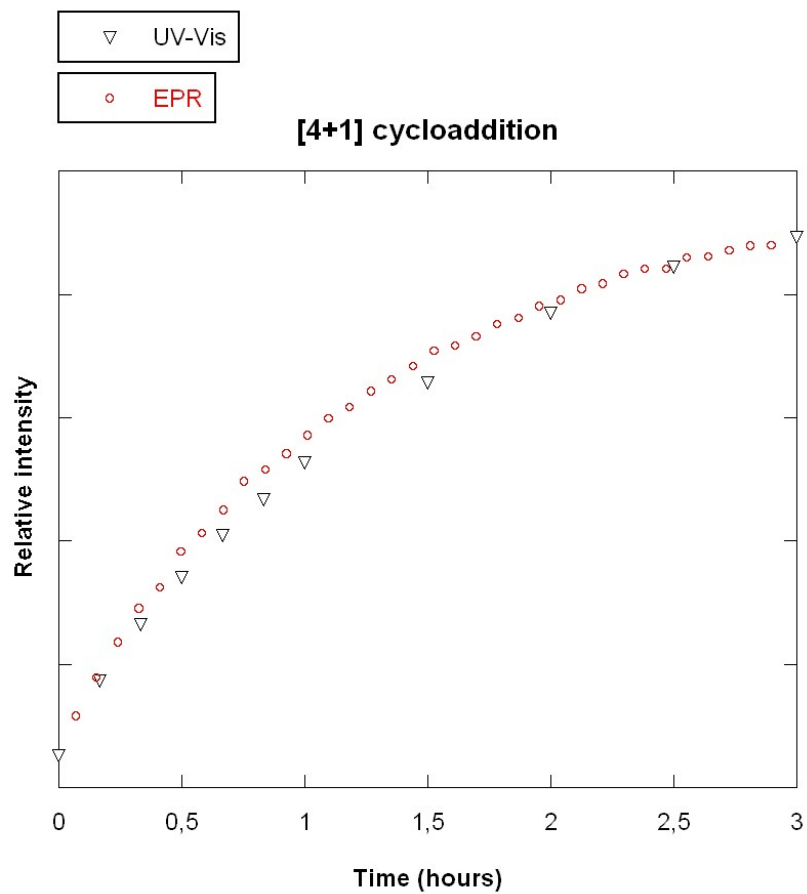

**Fig. S5.** Time course of the formation of the radical **3b<sup>•</sup>** by UV-Vis spectroscopy (recorded at 528 nm) and EPR . **[2b]** = **[PPh<sub>3</sub>]** = 0.5 mM, 25°C.

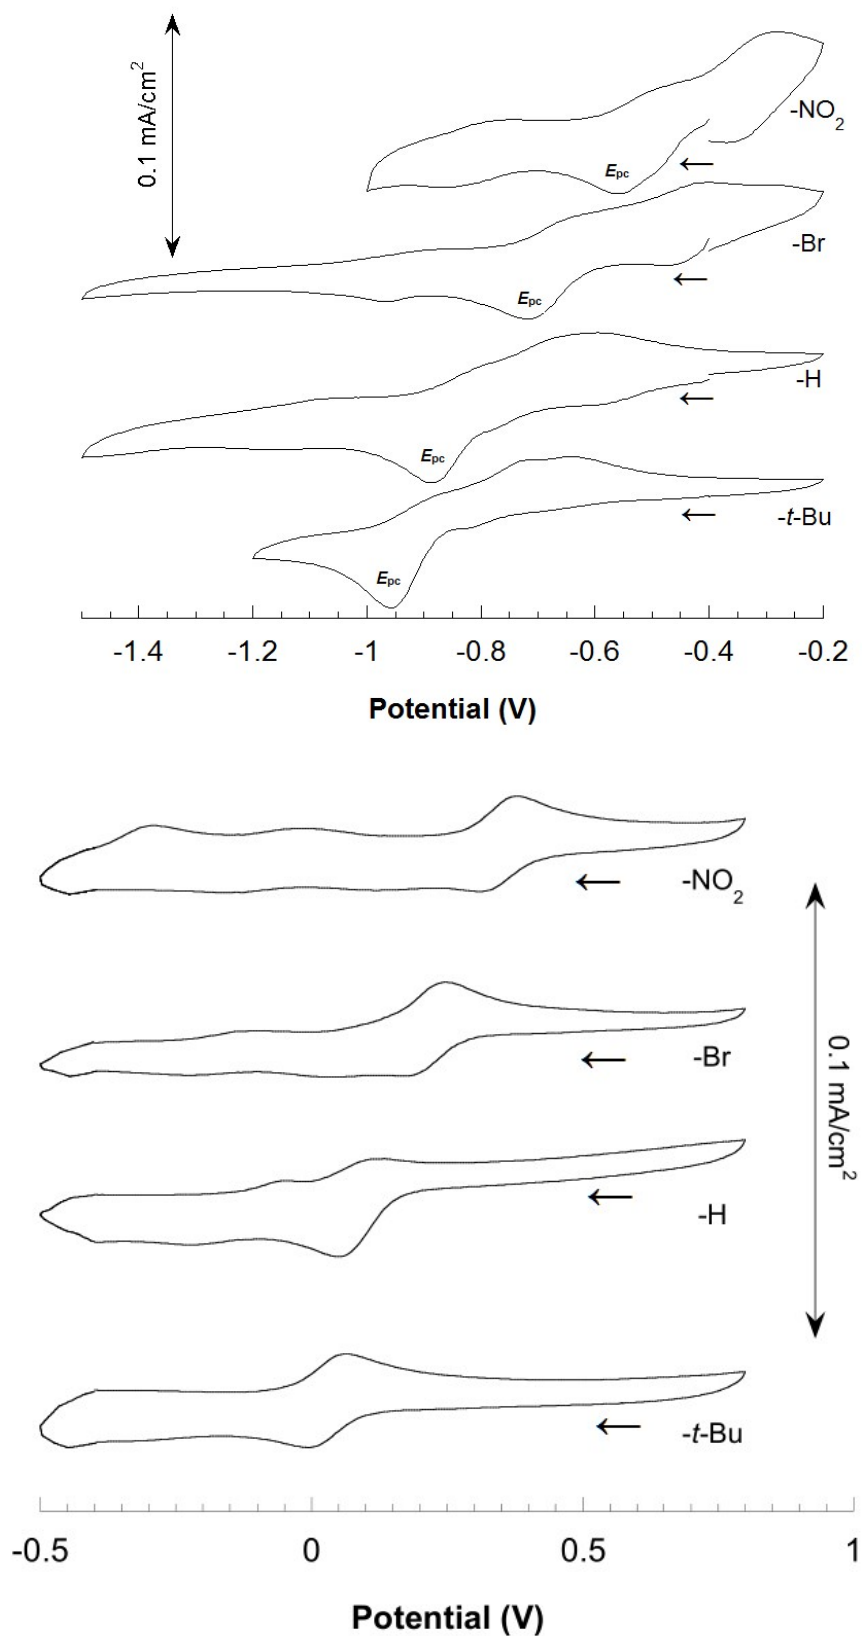

**Fig. S6.** The CVs of **1a-d** (top) and **2a-d** (bottom) in MeCN.

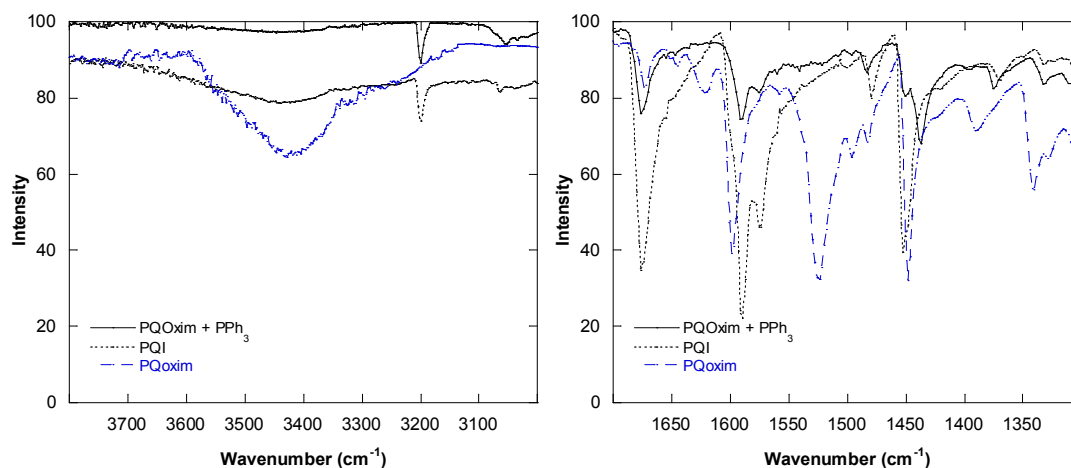

**Fig. S7** The IR spectra of 9,10-phenanthrenequinone monoimine, 9,10-phenanthrenequinone oxime and the reaction product between 9,10-phenanthrenequinone oxime and triphenylphosphine under argon in MeCN at 25°C after 2 h reflux. Recorded in KBr.

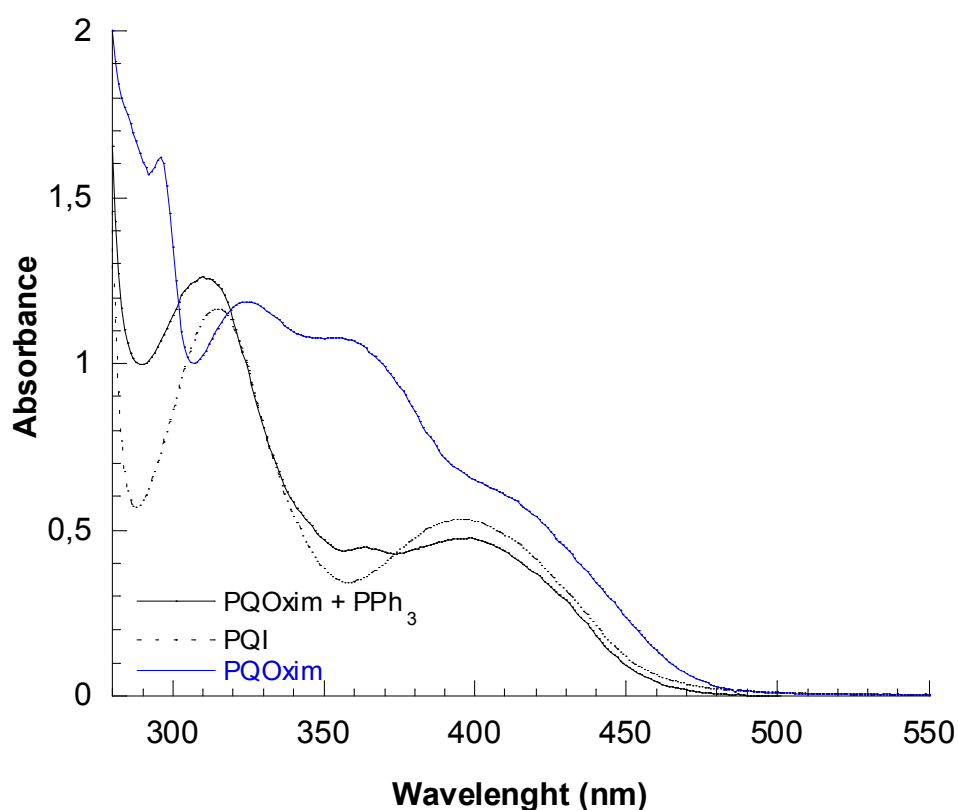

**Fig. S8.** The UV-Vis spectra of 9,10-phenanthrenequinone monoimine, 9,10-phenanthrenequinone oxime and the reaction product between 9,10-phenanthrenequinone oxime and triphenylphosphine in MeCN after 2 h reflux.

### Kinetic measurements

Concentration changes of the red intermediate were followed by UV-visible spectroscopy. As a solvent dried, argon saturated acetonitrile was used. To defend the reaction mixture from air a 1 cm length screw cap cuvette with a septum was used where the volume of the reaction mixture was 4 ml. The measurements were carried out in a thermostable cuvette holder. The molar absorption coefficient of the red intermediate was determined by an instantaneous hydrogen abstraction reaction between TEMPO and oxazaphosphole. In this reaction the absorption immediately reach the maximum at room temperature. 0.1 cm length cuvette was used to determine the calibration line. Therefore the equation of figure below shows the tenth molar absorption coefficient (Fig. S1).

**Table S1:** Kinetic data for the reaction of PQI (**1b**) with PPh<sub>3</sub>.

| Exp. entry | [ <b>1b</b> ] <sub>0</sub> (10 <sup>-3</sup> M) | [PPh <sub>3</sub> ] (10 <sup>-3</sup> M) | <i>T</i> (°C) | <i>V</i> <sub><i>t</i></sub> <sup>a</sup> (10 <sup>-4</sup> M s <sup>-1</sup> ) |
|------------|-------------------------------------------------|------------------------------------------|---------------|---------------------------------------------------------------------------------|
| 1          | 1                                               | 2.5                                      | 25            | 2.93 ± 0.05                                                                     |
| 2          | 1                                               | 3.75                                     | 25            | 3.90 ± 0.15                                                                     |
| 2          | 1                                               | 5                                        | 25            | 4.83 ± 0.32                                                                     |
| 3          | 1                                               | 10                                       | 25            | 6.91 ± 0.34                                                                     |
| 4          | 1                                               | 12.5                                     | 25            | 8.41 ± 0.41                                                                     |
| 5          | 1                                               | 15                                       | 25            | 8.86 ± 0.39                                                                     |
| 6          | 1                                               | 17.5                                     | 25            | 9.32 ± 0.46                                                                     |
| 7          | 0.75                                            | 10                                       | 25            | 4.68 ± 0.27                                                                     |
| 8          | 0.5                                             | 10                                       | 25            | 3.14 ± 0.09                                                                     |
| 9          | 0.25                                            | 10                                       | 25            | 1.45 ± 0.02                                                                     |
| 10         | 1                                               | 10                                       | 15            | 4.63 ± 0.27                                                                     |
| 11         | 1                                               | 10                                       | 20            | 5.67 ± 0.31                                                                     |
| 12         | 1                                               | 10                                       | 30            | 9.44 ± 0.42                                                                     |
| 13         | 1                                               | 10                                       | 35            | 12.2 ± 0.51                                                                     |
| 14         | 1                                               | 10                                       | 40            | 14.8 ± 0.49                                                                     |
| 15         | 1                                               | 10                                       | 45            | 18.1 ± 0.57                                                                     |
| 16         | 1 <sup>a</sup>                                  | 10                                       | 25            | 3.83 ± 0.14                                                                     |

<sup>a</sup>with deuterated PQI.

**Table S2:** Kinetic data for the reaction of PQI (**1d**) with PPh<sub>3</sub>.

| Exp. entry | [ <b>1b</b> ] <sub>0</sub> (10 <sup>-3</sup> M) | [PPh <sub>3</sub> ] (10 <sup>-3</sup> M) | <i>T</i> (°C) | <i>V</i> <sub><i>t</i></sub> <sup>a</sup> (10 <sup>-3</sup> M s <sup>-1</sup> ) |
|------------|-------------------------------------------------|------------------------------------------|---------------|---------------------------------------------------------------------------------|
| 1          | 1                                               | 1                                        | 25            | 2.19 ± 0.02                                                                     |
| 2          | 1                                               | 2                                        | 25            | 3.34 ± 0.11                                                                     |
| 2          | 1                                               | 3                                        | 25            | 3.99 ± 0.13                                                                     |
| 3          | 1                                               | 4                                        | 25            | 5.60 ± 0.24                                                                     |
| 4          | 1                                               | 5                                        | 25            | 6.54 ± 0.39                                                                     |
| 5          | 1                                               | 6                                        | 25            | 7.20 ± 0.37                                                                     |
| 6          | 1                                               | 7                                        | 25            | 7.46 ± 0.40                                                                     |
| 7          | 1                                               | 8                                        | 25            | 8.48 ± 0.41                                                                     |
| 8          | 1                                               | 9                                        | 25            | 9.31 ± 0.46                                                                     |
| 9          | 1                                               | 10                                       | 25            | 9.75 ± 0.43                                                                     |
| 7          | 0.75                                            | 10                                       | 25            | 7.31 ± 0.27                                                                     |
| 8          | 0.5                                             | 10                                       | 25            | 4.26 ± 0.12                                                                     |
| 9          | 0.25                                            | 10                                       | 25            | 1.84 ± 0.03                                                                     |
| 10         | 1                                               | 10                                       | 10            | 6.69 ± 0.29                                                                     |
| 11         | 1                                               | 10                                       | 15            | 7.72 ± 0.30                                                                     |
| 12         | 1                                               | 10                                       | 20            | 8.34 ± 0.35                                                                     |
| 13         | 1                                               | 10                                       | 30            | 10.5 ± 0.44                                                                     |
| 14         | 1                                               | 10                                       | 35            | 11.7 ± 0.46                                                                     |

## Methods

Density Functional Theory (DFT) calculations were performed with the Gaussian 09 software package<sup>11</sup>. The M06-2X hybrid functional was used<sup>12</sup> together with the TZVP basis set<sup>13</sup>. Geometry optimizations were carried out using the SMD (Solvation Model based on solute electron Density)<sup>14</sup> to account for solvent effects. Frequency calculations were done to verify that the calculated structures are stationary points on the potential energy surfaces (PES). The relative energies are given as Gibbs free energies. TD-DFT simulations were carried out using the B97D functional<sup>15</sup> with the TZVP basis sets and SMD.

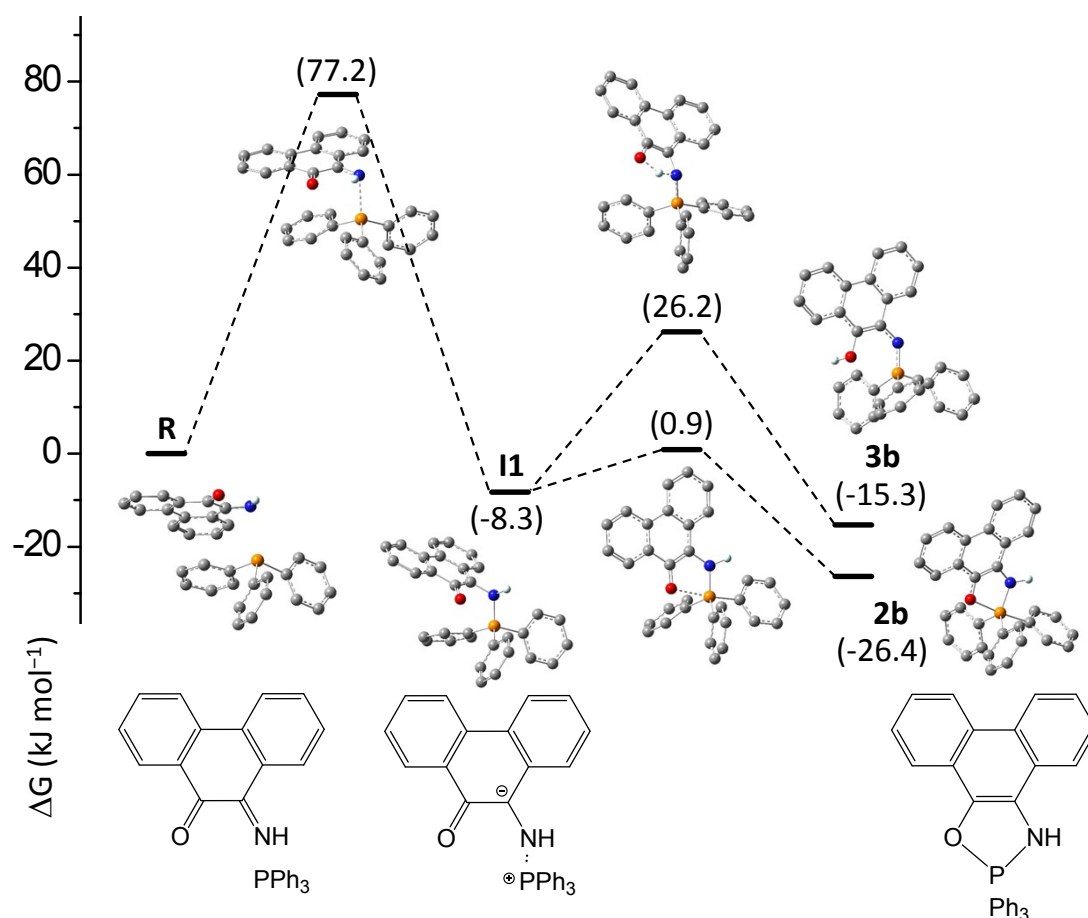

**Fig. S9.** Reaction pathway of the *Direct Complex formation* of the PQI-PPh<sub>3</sub> complexes. Hydrogen atoms are omitted except the one on the nitrogen atom.

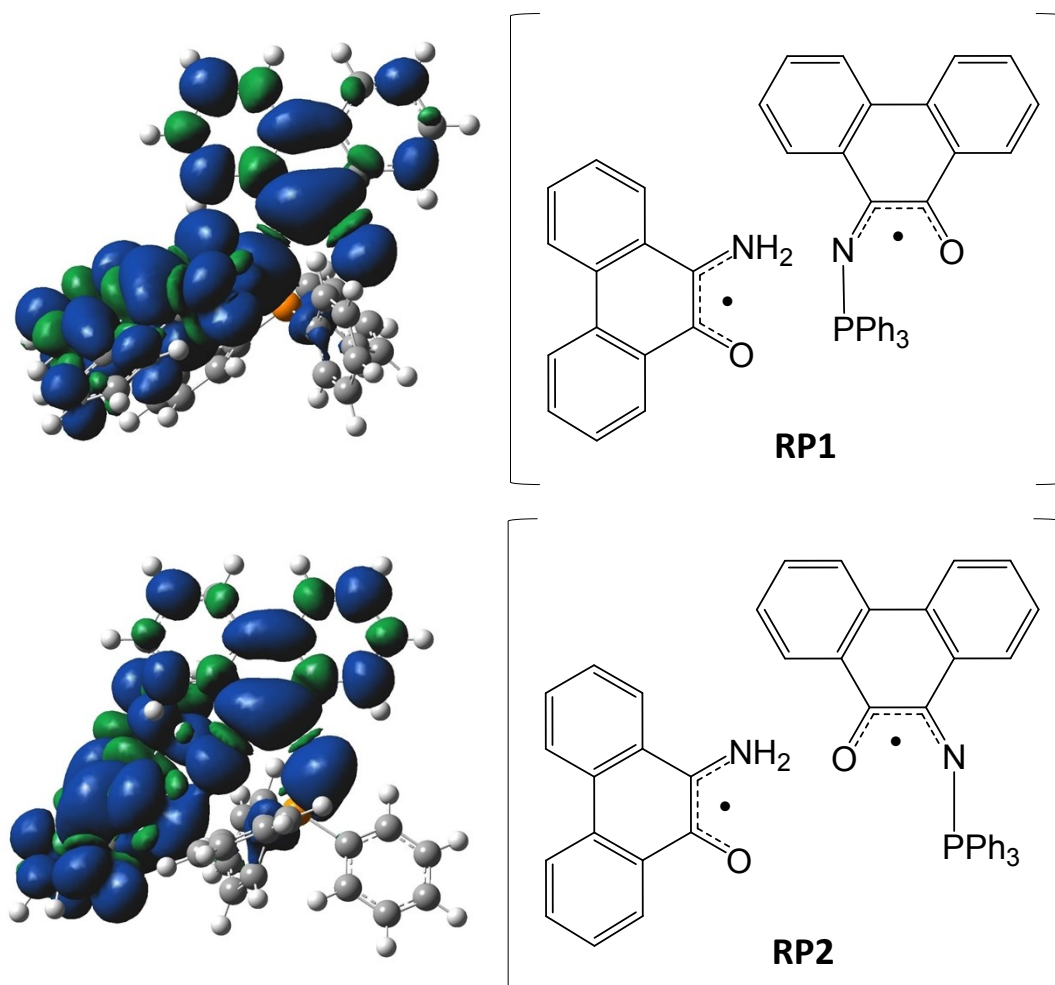

**Fig. S10.** Structures and spin densities of possible radical pairs in a solvent cage. The unpaired electrons are distributed on the whole aromatic ring and the oxygen and nitrogen atoms as well.

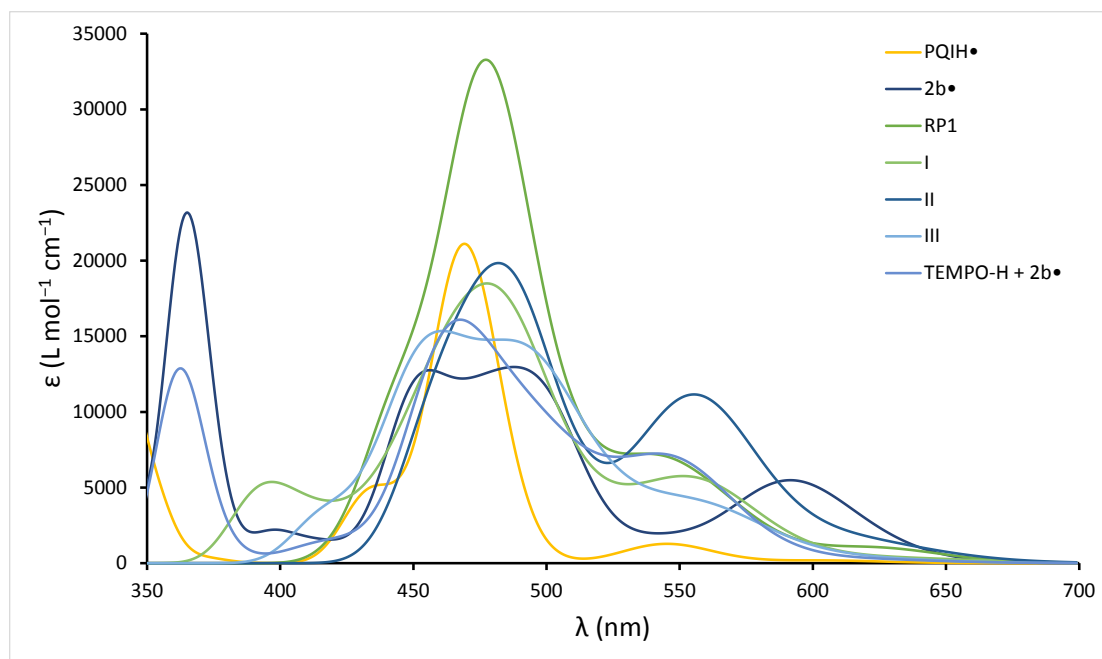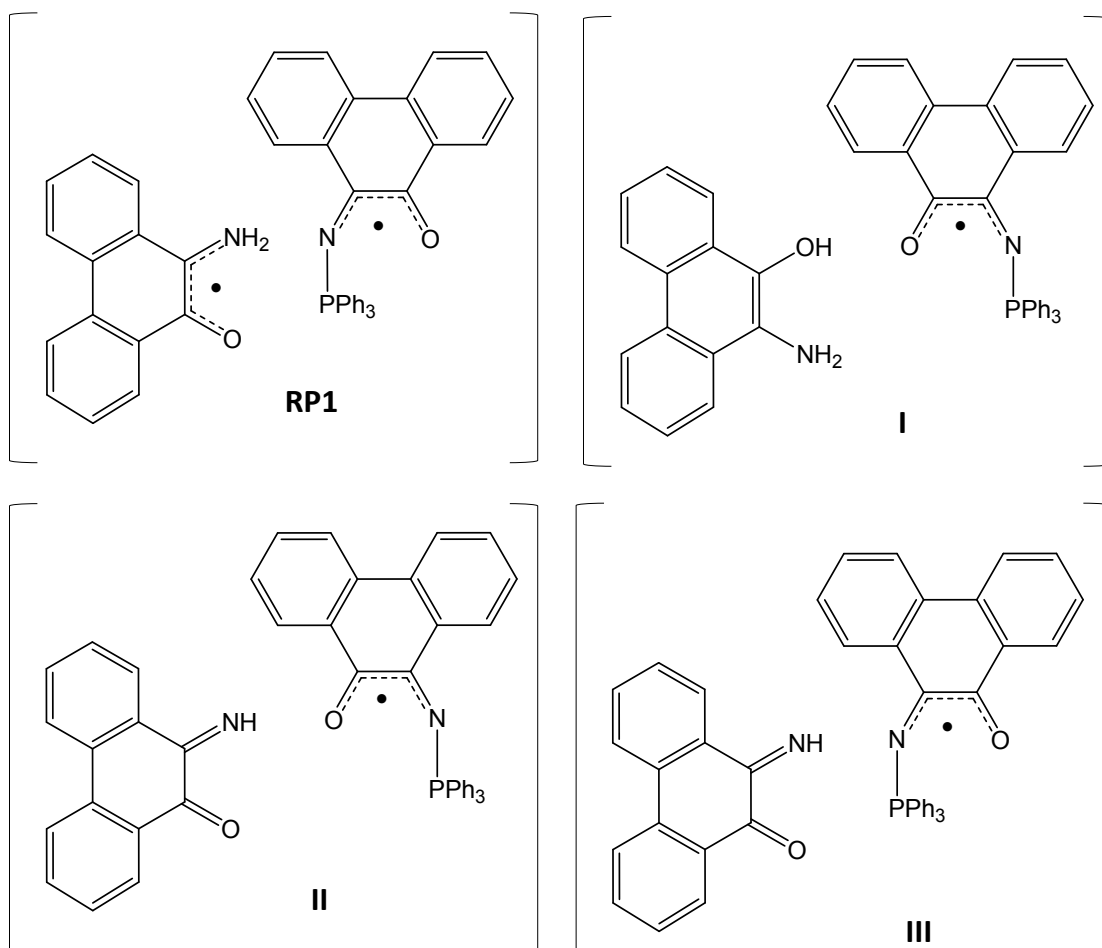

**Fig. S11.** Simulated UV-VIS spectra at the B97D/TZVP theoretical level and the related structures. The half widths values of the peaks are 0.1 eV.



## NUMBER OF ATOMS, ENERGIES, AND COORDINATES OF THE STRUCTURES OPTIMIZED BY M062X/TZVP/SMD METHOD

Number of atoms: 25  
 Name of the species: PhenQ  
 Energies in an atomic unit (Hartree):  
 Electronic energy:  
 E(SCF) = -668.853237912  
 Zero-point corrected energy:  
 E(ZPE) = -668.660358  
 Gibbs free energy:  
 E(G) = -668.698461 a.u.  
 Cartesian coordinates:

|   |             |             |             |
|---|-------------|-------------|-------------|
| C | -3.55328100 | -0.78052600 | 0.01888300  |
| C | -2.85602100 | 0.41146400  | -0.02876400 |
| C | -1.46033600 | 0.41450400  | -0.02672300 |
| C | -0.73089600 | -0.78651600 | 0.01103000  |
| C | -1.45710600 | -1.97981800 | 0.06796900  |
| C | -2.84341300 | -1.97653200 | 0.06984700  |
| C | -0.76969700 | 1.71616900  | -0.06701800 |
| C | 0.75472700  | -0.77776100 | -0.00397300 |
| C | 1.46614000  | 0.43310400  | 0.02026800  |
| C | 0.75029500  | 1.72493500  | 0.06066300  |
| C | 2.86125400  | 0.43307100  | 0.01080500  |
| H | 3.38143300  | 1.38206600  | 0.03067100  |
| C | 3.56710600  | -0.75548000 | -0.02942800 |
| C | 2.87203100  | -1.95991600 | -0.06382000 |
| C | 1.48687800  | -1.96875600 | -0.05425200 |
| H | -4.63566700 | -0.78374500 | 0.02071700  |
| H | -3.37799900 | 1.35955700  | -0.06263000 |
| H | -0.94893600 | -2.93212400 | 0.11495600  |
| H | -3.37476100 | -2.91941700 | 0.11477000  |
| H | 4.64971000  | -0.74652900 | -0.03884400 |
| H | 3.41090000  | -2.89858000 | -0.10289000 |
| H | 0.98098100  | -2.92286200 | -0.09075500 |
| O | -1.35290200 | 2.77309700  | -0.16905600 |
| N | 1.36159900  | 2.82793000  | 0.18329700  |
| H | 0.68028200  | 3.59369900  | 0.17044800  |

24

PhenQ-N-rad, E(SCF) = -668.192943427, E(ZPE) = -668.013244, E(G) = -668.051693 a.u.

|   |             |             |             |
|---|-------------|-------------|-------------|
| C | -3.52174700 | -0.80911600 | 0.05274700  |
| C | -2.84836400 | 0.39263600  | -0.06213400 |
| C | -1.45356700 | 0.42044200  | -0.06273100 |
| C | -0.70227500 | -0.76374100 | 0.03277900  |
| C | -1.40369300 | -1.96565700 | 0.15420000  |
| C | -2.79011000 | -1.98726700 | 0.16500400  |
| C | -0.79482000 | 1.73832800  | -0.16553700 |
| C | 0.78109700  | -0.72977900 | -0.01096800 |
| C | 1.46833900  | 0.49065600  | 0.05179900  |
| C | 0.70376000  | 1.75553300  | 0.16790100  |
| C | 2.86100800  | 0.53648200  | 0.01725600  |
| H | 3.36204000  | 1.49604100  | 0.06065500  |
| C | 3.59260900  | -0.63340300 | -0.08567300 |
| C | 2.92534400  | -1.85135700 | -0.15924900 |
| C | 1.54058200  | -1.89778900 | -0.12553500 |
| H | -4.60383600 | -0.83160300 | 0.06302400  |
| H | -3.38830400 | 1.32785900  | -0.14208100 |
| H | -0.87456300 | -2.90326700 | 0.24840000  |
| H | -3.30362600 | -2.93559300 | 0.26614200  |
| H | 4.67407900  | -0.59709700 | -0.11744700 |
| H | 3.48597600  | -2.77336600 | -0.25085400 |
| H | 1.05557100  | -2.86096200 | -0.19997400 |
| O | -1.36769100 | 2.75849000  | -0.45506900 |
| N | 1.19788900  | 2.83346700  | 0.55621900  |

26

PhenQ-NH2-rad, E(SCF) = -669.466929201, E(ZPE) = -669.263688, E(G) = -669.302526 a.u.

|   |             |             |            |
|---|-------------|-------------|------------|
| C | -3.58397100 | -0.68454400 | 0.00365700 |
| C | -2.84112300 | 0.47698200  | 0.00890200 |
| C | -1.44097400 | 0.43002700  | 0.00915400 |

|   |             |             |             |
|---|-------------|-------------|-------------|
| C | -0.76987700 | -0.80703500 | -0.00595600 |
| C | -1.54824700 | -1.97655600 | -0.00988200 |
| C | -2.92825000 | -1.91810100 | -0.00772600 |
| C | -0.70104900 | 1.69781900  | -0.00073800 |
| C | 0.69916400  | -0.84155800 | 0.00580100  |
| C | 1.43814300  | 0.36686700  | -0.00845100 |
| C | 0.74211600  | 1.62953300  | 0.00159800  |
| C | 2.84566700  | 0.31734400  | -0.00578700 |
| H | 3.42672400  | 1.23048000  | -0.01101300 |
| C | 3.51401100  | -0.88682300 | -0.00167400 |
| C | 2.78905700  | -2.08021800 | 0.00705200  |
| C | 1.40811200  | -2.05090100 | 0.00781300  |
| H | -4.66611100 | -0.64225900 | 0.00564100  |
| H | -3.32239200 | 1.44677000  | 0.01539900  |
| H | -1.07672200 | -2.94907100 | -0.02165000 |
| H | -3.50164200 | -2.83700800 | -0.01342300 |
| H | 4.59661600  | -0.90442000 | -0.00229200 |
| H | 3.30675700  | -3.03127700 | 0.01148500  |
| H | 0.87595900  | -2.99154100 | 0.01747200  |
| O | -1.27140600 | 2.80525000  | -0.00384800 |
| N | 1.37365200  | 2.80709500  | 0.00057800  |
| H | 0.80386900  | 3.64321700  | 0.00359700  |
| H | 2.37594800  | 2.90643800  | -0.00106400 |

52

phenQ-reduced\_phenQ\_DIMER, E(SCF) = -1338.95824323, E(ZPE) = -1338.548011, E(G) = -1338.600676 a.u.

|   |             |             |             |
|---|-------------|-------------|-------------|
| C | -2.49688200 | 1.40093000  | 2.48090400  |
| C | -2.11777200 | 0.09194200  | 2.25877200  |
| C | -0.80284900 | -0.21149200 | 1.89779400  |
| C | 0.16554900  | 0.79827300  | 1.76567300  |
| C | -0.24655800 | 2.11877700  | 1.97425800  |
| C | -1.55372800 | 2.41469600  | 2.32577300  |
| C | -0.47358600 | -1.61717600 | 1.61374000  |
| C | 1.57138400  | 0.46460800  | 1.42841500  |
| C | 1.94282000  | -0.85968100 | 1.13649200  |
| C | 0.93618100  | -1.93746100 | 1.13997900  |
| C | 3.26527800  | -1.17011400 | 0.82016400  |
| H | 3.52230800  | -2.19887700 | 0.60063700  |
| C | 4.23622100  | -0.18328900 | 0.79880100  |
| C | 3.88208600  | 1.12633100  | 1.10132400  |
| C | 2.56847200  | 1.44405800  | 1.41226300  |
| H | -3.51721400 | 1.63808200  | 2.75495700  |
| H | -2.83098600 | -0.71737300 | 2.35289200  |
| H | 0.45087100  | 2.93656400  | 1.86161600  |
| H | -1.83952600 | 3.44821000  | 2.48013600  |
| H | 5.26184000  | -0.43265400 | 0.55699500  |
| H | 4.63177200  | 1.90835500  | 1.09659700  |
| H | 2.33317800  | 2.47277000  | 1.64631400  |
| O | -1.28001700 | -2.52123900 | 1.70192300  |
| N | 1.21226500  | -3.11431200 | 0.74022500  |
| H | 0.38457900  | -3.71024700 | 0.84235200  |
| C | -4.19973700 | -0.11969000 | -0.77453400 |
| C | -3.19972800 | -1.04614300 | -0.97180300 |
| C | -1.87860400 | -0.63900700 | -1.23756700 |
| C | -1.57585800 | 0.74122100  | -1.31204400 |
| C | -2.61909500 | 1.66356300  | -1.10363200 |
| C | -3.90591900 | 1.24626900  | -0.84338300 |
| C | -0.83564400 | -1.62363300 | -1.44164300 |
| C | -0.21344200 | 1.16365000  | -1.60673100 |
| C | 0.76905700  | 0.17989000  | -1.85688200 |
| C | 0.43597700  | -1.20930000 | -1.72898700 |
| C | 2.08810400  | 0.56684000  | -2.16963100 |
| H | 2.82477500  | -0.20337600 | -2.35553100 |
| C | 2.43083400  | 1.89669500  | -2.22933000 |
| C | 1.46598400  | 2.88033600  | -1.96641800 |
| C | 0.17192400  | 2.51720400  | -1.66565400 |
| H | -5.21227500 | -0.44993300 | -0.57715900 |
| H | -3.44395300 | -2.10019900 | -0.94016700 |
| H | -2.42018300 | 2.72529500  | -1.15633100 |
| H | -4.68909500 | 1.97910800  | -0.69223400 |
| H | 3.44776400  | 2.18476700  | -2.46791300 |
| H | 1.73572500  | 3.92874800  | -2.00354300 |
| H | -0.55218000 | 3.29631300  | -1.46898200 |
| H | -0.37106300 | -3.59917000 | -1.52008800 |
| O | 1.42937500  | -2.12662000 | -1.95677800 |

|   |             |             |             |
|---|-------------|-------------|-------------|
| N | -1.15507800 | -2.97181100 | -1.40576700 |
| H | -1.76105400 | -3.26322500 | -0.64806700 |
| H | 1.58672700  | -2.64722200 | -1.14153900 |

52

phenQ-NH2-rad\_DIMER\_stacking, E(SCF) = -1338.95208289, E(ZPE) = -1338.540482, E(G) = -1338.592329 a.u.

|   |             |             |             |
|---|-------------|-------------|-------------|
| C | -3.95512900 | -1.16245300 | -1.17177000 |
| C | -3.35246000 | 0.07401500  | -1.07359800 |
| C | -1.96846600 | 0.20896800  | -1.23545300 |
| C | -1.16731700 | -0.91378100 | -1.51193600 |
| C | -1.80067000 | -2.16318700 | -1.59997400 |
| C | -3.16741300 | -2.28626400 | -1.42997800 |
| C | -1.38752200 | 1.55136400  | -1.13253200 |
| C | 0.27896100  | -0.74958500 | -1.72270100 |
| C | 0.85096700  | 0.54452200  | -1.72885400 |
| C | 0.04503200  | 1.68578200  | -1.35778000 |
| C | 2.20723200  | 0.70438300  | -2.05899600 |
| H | 2.64537500  | 1.69342100  | -2.10590400 |
| C | 3.00249000  | -0.39077000 | -2.32546200 |
| C | 2.45799400  | -1.67383900 | -2.26549500 |
| C | 1.11462600  | -1.84188200 | -1.98360500 |
| H | -5.02586900 | -1.26339200 | -1.04370700 |
| H | -3.93249400 | 0.96442600  | -0.86538400 |
| H | -1.22731100 | -3.05466700 | -1.81382300 |
| H | -3.62723300 | -3.26401600 | -1.51007100 |
| H | 4.04852600  | -0.25183600 | -2.56974900 |
| H | 3.07912900  | -2.53952200 | -2.46005600 |
| H | 0.71499800  | -2.84647400 | -1.96536600 |
| O | -2.07031900 | 2.55728600  | -0.88596400 |
| N | 0.49996200  | 2.94307300  | -1.44030500 |
| H | -0.15595500 | 3.66332600  | -1.16101900 |
| H | 1.48024800  | 3.14354900  | -1.28617900 |
| C | -3.00252700 | -0.35701400 | 2.33196900  |
| C | -2.20630500 | 0.73422800  | 2.05244400  |
| C | -0.85063400 | 0.56918400  | 1.72288500  |
| C | -0.27957100 | -0.72532800 | 1.73178000  |
| C | -1.11621500 | -1.81374500 | 2.00521200  |
| C | -2.45933900 | -1.64113800 | 2.28580100  |
| C | -0.04384300 | 1.70514600  | 1.33712700  |
| C | 1.16657600  | -0.89330500 | 1.52270400  |
| C | 1.96868800  | 0.22546500  | 1.23314900  |
| C | 1.38870700  | 1.56666000  | 1.11293400  |
| C | 3.35262400  | 0.08766500  | 1.07329900  |
| H | 3.93334600  | 0.97511100  | 0.85468500  |
| C | 3.95432200  | -1.14800100 | 1.18607700  |
| C | 3.16557800  | -2.26818400 | 1.45685800  |
| C | 1.79885300  | -2.14215000 | 1.62515900  |
| H | -4.04814100 | -0.21417400 | 2.57577500  |
| H | -2.64326300 | 1.72416200  | 2.08898300  |
| H | -0.71755100 | -2.81884800 | 1.99861400  |
| H | -3.08116900 | -2.50403600 | 2.49026800  |
| H | 5.02501000  | -1.25136200 | 1.05953000  |
| H | 3.62458200  | -3.24536500 | 1.54798300  |
| H | 1.22465500  | -3.03063800 | 1.84900400  |
| H | 0.15936700  | 3.68052700  | 1.11738000  |
| H | -1.47803400 | 3.16462000  | 1.25438300  |
| O | 2.07172200  | 2.56902200  | 0.85287400  |
| N | -0.49723000 | 2.96323900  | 1.40227500  |

27

phenQ\_reduced, E(SCF) = -670.082181011, E(ZPE) = -669.866349, E(G) = -669.904371 a.u.

|   |             |             |             |
|---|-------------|-------------|-------------|
| C | 3.54345900  | -0.78147400 | -0.06067600 |
| C | 2.82682300  | 0.39131400  | -0.09024600 |
| C | 1.41664200  | 0.38020100  | -0.02053600 |
| C | 0.73323300  | -0.85899500 | 0.02807700  |
| C | 1.49818300  | -2.04106300 | 0.06676400  |
| C | 2.87376300  | -2.00889900 | 0.02666700  |
| C | 0.66292300  | 1.59964300  | -0.00167200 |
| C | -0.72172000 | -0.86360300 | 0.03622300  |
| C | -1.42279900 | 0.36439000  | -0.02150300 |
| C | -0.69841000 | 1.61300800  | 0.01697100  |
| C | -2.83226100 | 0.35504400  | -0.07717200 |
| H | -3.37435600 | 1.28908500  | -0.14967000 |
| C | -3.53334900 | -0.82753800 | -0.06578500 |
| C | -2.84488900 | -2.04557000 | 0.00391700  |
| C | -1.46970200 | -2.05843300 | 0.04511300  |

|   |             |             |             |
|---|-------------|-------------|-------------|
| H | 4.62493300  | -0.75476900 | -0.11351600 |
| H | 3.36356000  | 1.32794000  | -0.18193200 |
| H | 1.00602800  | -3.00222200 | 0.12316800  |
| H | 3.43663500  | -2.93347700 | 0.05610100  |
| H | -4.61522800 | -0.81626800 | -0.11541900 |
| H | -3.39355200 | -2.97920800 | 0.01407900  |
| H | -0.96345000 | -3.01296700 | 0.08521300  |
| O | 1.29218700  | 2.82043000  | -0.01878100 |
| N | -1.38939000 | 2.82505700  | -0.01461300 |
| H | -0.79136300 | 3.61292200  | 0.20169100  |
| H | 2.12938000  | 2.77539100  | 0.46076500  |
| H | -2.22572900 | 2.84658900  | 0.55520500  |

**DIRECT COMPLEX FORMATION:**

59

Reactant, E(SCF) = -1705.09532932, E(ZPE) = -1704.627151, E(G) = -1704.693088 a.u.

|   |             |             |             |
|---|-------------|-------------|-------------|
| C | 4.36653700  | -3.27734900 | -0.59685000 |
| C | 3.33370800  | -2.66512800 | -1.28155500 |
| C | 3.05259500  | -1.31399600 | -1.07679900 |
| C | 3.80733400  | -0.54251600 | -0.17655300 |
| C | 4.84998700  | -1.18138600 | 0.50192200  |
| C | 5.12501300  | -2.52456600 | 0.29473200  |
| C | 1.93396000  | -0.71882200 | -1.83238100 |
| C | 3.46715300  | 0.88046100  | 0.07589200  |
| C | 2.40982500  | 1.50063900  | -0.61083700 |
| C | 1.62841100  | 0.75812500  | -1.62054800 |
| C | 2.06654300  | 2.82453600  | -0.33157800 |
| H | 1.23688100  | 3.27027100  | -0.86611300 |
| C | 2.76559300  | 3.55167500  | 0.61485800  |
| C | 3.82142900  | 2.94985600  | 1.29235400  |
| C | 4.16496000  | 1.63511900  | 1.02557900  |
| H | 4.58365500  | -4.32612000 | -0.75400500 |
| H | 2.72520800  | -3.22169400 | -1.98329600 |
| H | 5.46412300  | -0.63839600 | 1.20565100  |
| H | 5.93962200  | -2.98859700 | 0.83744600  |
| H | 2.49095700  | 4.57728800  | 0.82769700  |
| H | 4.37832300  | 3.50558000  | 2.03678400  |
| H | 4.98466700  | 1.19975600  | 1.57899600  |
| O | 1.26316700  | -1.34799700 | -2.62161500 |
| N | 0.71095200  | 1.30943000  | -2.30061600 |
| P | -1.89003000 | -0.30971700 | -0.71116400 |
| C | -0.68529900 | -0.07744000 | 0.66954600  |
| C | -0.63116800 | 1.06220600  | 1.46908900  |
| C | 0.24822900  | -1.09791700 | 0.87999600  |
| C | 0.33405600  | 1.17758300  | 2.46655900  |
| H | -1.34300800 | 1.86590000  | 1.32311900  |
| C | 1.20042200  | -0.98868300 | 1.88440400  |
| H | 0.22038700  | -1.99206400 | 0.26367500  |
| C | 1.24951200  | 0.15424300  | 2.67754000  |
| H | 0.36532500  | 2.07044300  | 3.08005100  |
| H | 1.91353800  | -1.79038200 | 2.03881500  |
| H | 1.99968700  | 0.24659500  | 3.45387400  |
| C | -2.94603800 | 1.20001700  | -0.54721200 |
| C | -2.55370000 | 2.33118900  | -1.26696200 |
| C | -4.09007600 | 1.26482000  | 0.24721700  |
| C | -3.28342300 | 3.51074700  | -1.18027500 |
| H | -1.66629600 | 2.29100100  | -1.89087400 |
| C | -4.82602600 | 2.44239900  | 0.32433100  |
| H | -4.41197300 | 0.39748800  | 0.81148500  |
| C | -4.42345900 | 3.56717300  | -0.38618800 |
| H | -2.96697100 | 4.38262900  | -1.74029600 |
| H | -5.71497100 | 2.47920100  | 0.94280300  |
| H | -4.99842500 | 4.48333600  | -0.32574000 |
| C | -2.99539400 | -1.61591500 | -0.01092200 |
| C | -3.06745600 | -1.93650400 | 1.34508100  |
| C | -3.80974400 | -2.30196000 | -0.91360900 |
| C | -3.94249400 | -2.92176700 | 1.78843700  |
| H | -2.44397900 | -1.41398200 | 2.06152000  |
| C | -4.69191500 | -3.27967300 | -0.46907800 |
| H | -3.75355400 | -2.07090900 | -1.97238400 |
| C | -4.75784000 | -3.59230200 | 0.88372200  |
| H | -3.98966100 | -3.16233200 | 2.84388100  |
| H | -5.32030300 | -3.80233700 | -1.18013900 |
| H | -5.43929200 | -4.35895700 | 1.23225500  |
| H | 0.28708400  | 0.61081000  | -2.91998400 |

59

TS1, E(SCF) = -1705.07008023, E(ZPE) = -1704.601155, E(G) = -1704.663699 a.u.

|   |             |             |             |
|---|-------------|-------------|-------------|
| C | -4.46899300 | -2.81516700 | 0.18875700  |
| C | -3.26153800 | -2.59305500 | -0.44049600 |
| C | -2.82614400 | -1.29196300 | -0.71594500 |
| C | -3.60777400 | -0.18024100 | -0.34494800 |
| C | -4.83584800 | -0.43211200 | 0.28890400  |
| C | -5.25801600 | -1.72157500 | 0.55150100  |
| C | -1.50470600 | -1.11621800 | -1.34731300 |
| C | -3.11980600 | 1.18926700  | -0.58683900 |
| C | -1.83934300 | 1.38340500  | -1.14678900 |
| C | -1.03720600 | 0.24188200  | -1.56206900 |
| C | -1.34862700 | 2.68813400  | -1.31191000 |
| H | -0.36294500 | 2.82129800  | -1.74035400 |
| C | -2.10005300 | 3.78296800  | -0.93502400 |
| C | -3.37365600 | 3.59799000  | -0.39347100 |
| C | -3.86965900 | 2.31857800  | -0.22516900 |
| H | -4.80131000 | -3.82380500 | 0.40085800  |
| H | -2.62386400 | -3.41834600 | -0.73197600 |
| H | -5.47130400 | 0.38746300  | 0.59379300  |
| H | -6.20883000 | -1.88011500 | 1.04611300  |
| H | -1.70331300 | 4.78279700  | -1.06497600 |
| H | -3.97365500 | 4.45162100  | -0.10332100 |
| H | -4.85739500 | 2.20253600  | 0.19975200  |
| O | -0.78272700 | -2.07838500 | -1.64199600 |
| N | 0.20048200  | 0.40796300  | -2.01306400 |
| P | 1.61905400  | -0.06597700 | -0.27251600 |
| C | 2.45272600  | 1.48169700  | 0.19639500  |
| C | 2.72619200  | 1.80837200  | 1.52555400  |
| C | 2.84110100  | 2.34520300  | -0.82754100 |
| C | 3.38483200  | 2.99374300  | 1.82341100  |
| H | 2.42854500  | 1.13773900  | 2.32338600  |
| C | 3.50588900  | 3.52714400  | -0.52377500 |
| H | 2.61704900  | 2.09656700  | -1.85886000 |
| C | 3.77548500  | 3.85168500  | 0.80018800  |
| H | 3.59646300  | 3.24616000  | 2.85529300  |
| H | 3.80650600  | 4.19584600  | -1.32091400 |
| H | 4.28922400  | 4.77554400  | 1.03690900  |
| C | 0.48007500  | -0.48657700 | 1.07154100  |
| C | -0.40324000 | 0.50307300  | 1.50873600  |
| C | 0.33513000  | -1.79358400 | 1.54511700  |
| C | -1.40942500 | 0.19395400  | 2.41744800  |
| H | -0.30391900 | 1.52082400  | 1.14810500  |
| C | -0.66892300 | -2.09623000 | 2.45190600  |
| H | 1.00295300  | -2.57648800 | 1.20705600  |
| C | -1.54854300 | -1.10586500 | 2.88388100  |
| H | -2.08861300 | 0.97040600  | 2.74868300  |
| H | -0.77027900 | -3.10997400 | 2.81980200  |
| H | -2.33862900 | -1.35022200 | 3.58374400  |
| C | 2.90510800  | -1.35686800 | -0.36665600 |
| C | 4.21795100  | -1.13949200 | 0.05337400  |
| C | 2.54927500  | -2.58161100 | -0.93859000 |
| C | 5.15922800  | -2.15315600 | -0.07478400 |
| H | 4.50658600  | -0.18775700 | 0.48346500  |
| C | 3.49340400  | -3.59355000 | -1.05094100 |
| H | 1.53269000  | -2.73553500 | -1.28848500 |
| C | 4.79855100  | -3.37960800 | -0.62159800 |
| H | 6.17705800  | -1.98353900 | 0.25490100  |
| H | 3.21177800  | -4.54492800 | -1.48545100 |
| H | 5.53687200  | -4.16616500 | -0.71947400 |
| H | 0.51028100  | -0.47227400 | -2.43003600 |

59

I1, E(SCF) = -1705.10492592, E(ZPE) = -1704.635388, E(G) = -1704.696241 a.u.

|   |             |             |             |
|---|-------------|-------------|-------------|
| C | -4.90952100 | 2.71842300  | -0.31921000 |
| C | -3.56648800 | 2.56262200  | -0.58124400 |
| C | -2.99065700 | 1.28623900  | -0.68529300 |
| C | -3.78705700 | 0.13715800  | -0.50005300 |
| C | -5.16088900 | 0.32242700  | -0.23680500 |
| C | -5.71111800 | 1.58240000  | -0.14781200 |
| C | -1.53854100 | 1.19636300  | -0.95707900 |
| C | -3.17865200 | -1.18558500 | -0.58605800 |
| C | -1.79157400 | -1.27780000 | -0.89161400 |
| C | -1.02340000 | -0.09550500 | -1.10956500 |
| C | -1.20557100 | -2.56723700 | -0.94621900 |
| H | -0.15024000 | -2.64770000 | -1.17047500 |
| C | -1.94604600 | -3.70350600 | -0.71412500 |

|   |             |             |             |
|---|-------------|-------------|-------------|
| C | -3.31205000 | -3.60982800 | -0.41545100 |
| C | -3.90540900 | -2.36619300 | -0.35543500 |
| H | -5.34466500 | 3.70786700  | -0.24504500 |
| H | -2.91694000 | 3.41824100  | -0.71762400 |
| H | -5.80766300 | -0.53359300 | -0.09871900 |
| H | -6.76981600 | 1.69174300  | 0.05559800  |
| H | -1.46719500 | -4.67498200 | -0.76177600 |
| H | -3.89592100 | -4.50256300 | -0.22931600 |
| H | -4.95914700 | -2.30905500 | -0.11530500 |
| O | -0.82955800 | 2.23918800  | -1.01693600 |
| N | 0.38673500  | -0.23635300 | -1.36263400 |
| P | 1.49560100  | 0.06011300  | -0.15073000 |
| C | 0.68938400  | -0.37786700 | 1.39732700  |
| C | -0.26728100 | 0.49406800  | 1.92292000  |
| C | 0.94346500  | -1.60694100 | 2.00019000  |
| C | -0.97420900 | 0.12274000  | 3.05610300  |
| H | -0.45797800 | 1.44928000  | 1.44493500  |
| C | 0.23347400  | -1.96584500 | 3.14022600  |
| H | 1.68312300  | -2.28179300 | 1.58508400  |
| C | -0.72479900 | -1.10598100 | 3.66121500  |
| H | -1.72047700 | 0.79155800  | 3.46615500  |
| H | 0.42596300  | -2.91975200 | 3.61480600  |
| H | -1.28082700 | -1.39181900 | 4.54588100  |
| C | 2.14272400  | 1.75084600  | -0.05175900 |
| C | 2.39687300  | 2.35718600  | 1.17508400  |
| C | 2.45270400  | 2.40532700  | -1.24341400 |
| C | 2.94913500  | 3.63308200  | 1.20694300  |
| H | 2.16823800  | 1.84498800  | 2.10196300  |
| C | 3.00262000  | 3.67664100  | -1.20272100 |
| H | 2.25902100  | 1.93167700  | -2.19971400 |
| C | 3.24718300  | 4.29213300  | 0.02210500  |
| H | 3.14203400  | 4.10926500  | 2.16025000  |
| H | 3.23777300  | 4.19114000  | -2.12605000 |
| H | 3.67252300  | 5.28793100  | 0.05050500  |
| C | 2.92052600  | -1.01102200 | -0.46806500 |
| C | 4.10086900  | -0.80697700 | 0.24861800  |
| C | 2.83418500  | -2.03119900 | -1.41183600 |
| C | 5.19123600  | -1.63281000 | 0.02049700  |
| H | 4.17209700  | -0.00913800 | 0.97975500  |
| C | 3.93616000  | -2.84617500 | -1.64197500 |
| H | 1.91853700  | -2.18378000 | -1.96790200 |
| C | 5.10969000  | -2.64929700 | -0.92655500 |
| H | 6.10769900  | -1.47850700 | 0.57605900  |
| H | 3.87314700  | -3.63496700 | -2.38119900 |
| H | 5.96632700  | -3.28674200 | -1.10881300 |
| H | 0.69788400  | 0.08266800  | -2.27783900 |

59

TS2, E(SCF) = -1705.10420804, E(ZPE) = -1704.633916, E(G) = -1704.692735 a.u.

|   |             |             |             |
|---|-------------|-------------|-------------|
| C | 4.52797500  | -2.95270600 | 0.26621100  |
| C | 3.22799300  | -2.51527300 | 0.16440800  |
| C | 2.93866700  | -1.15651600 | -0.05489200 |
| C | 3.98845800  | -0.21552100 | -0.16875500 |
| C | 5.31196500  | -0.69457800 | -0.06041300 |
| C | 5.57772800  | -2.02867800 | 0.15282500  |
| C | 1.54450600  | -0.74263000 | -0.16656500 |
| C | 3.67730100  | 1.18831900  | -0.39903400 |
| C | 2.31194800  | 1.58490200  | -0.48127200 |
| C | 1.29493300  | 0.59524200  | -0.40529700 |
| C | 2.01118200  | 2.95744000  | -0.66515500 |
| H | 0.97742900  | 3.27843900  | -0.71348900 |
| C | 3.01024200  | 3.89661600  | -0.76439900 |
| C | 4.35552800  | 3.50754200  | -0.69086800 |
| C | 4.67086300  | 2.17851100  | -0.50621200 |
| H | 4.74302000  | -4.00098000 | 0.43507400  |
| H | 2.39556700  | -3.20289200 | 0.24942100  |
| H | 6.14477000  | -0.00892400 | -0.14147200 |
| H | 6.60463500  | -2.36452100 | 0.23315400  |
| H | 2.75554700  | 4.94134000  | -0.89894400 |
| H | 5.14286400  | 4.24634900  | -0.77343400 |
| H | 5.71484600  | 1.89996500  | -0.44677300 |
| O | 0.56566700  | -1.56342900 | -0.05813100 |
| N | -0.07432000 | 0.95698600  | -0.52556900 |
| P | -1.36542400 | 0.01605100  | -0.05711300 |
| C | -1.35444400 | -0.43265500 | 1.70577700  |
| C | -1.22326900 | -1.75985500 | 2.11104400  |
| C | -1.49933600 | 0.57940300  | 2.65282200  |

|   |             |             |             |
|---|-------------|-------------|-------------|
| C | -1.25831400 | -2.07044100 | 3.46241600  |
| H | -1.07079900 | -2.53614700 | 1.37516400  |
| C | -1.50686600 | 0.26262200  | 4.00598900  |
| H | -1.60166700 | 1.61360900  | 2.34787100  |
| C | -1.39680800 | -1.06116500 | 4.40995600  |
| H | -1.16595200 | -3.10246400 | 3.77723500  |
| H | -1.60882600 | 1.05170400  | 4.74041700  |
| H | -1.41406000 | -1.30812900 | 5.46462700  |
| C | -1.92113000 | -1.33911400 | -1.13057700 |
| C | -2.88536200 | -2.24607700 | -0.70204500 |
| C | -1.41083600 | -1.40965200 | -2.42388500 |
| C | -3.33233900 | -3.23506200 | -1.57193700 |
| H | -3.29771900 | -2.18408200 | 0.29819600  |
| C | -1.86716800 | -2.39449000 | -3.28831900 |
| H | -0.65122400 | -0.70851100 | -2.75107800 |
| C | -2.82520700 | -3.30924900 | -2.86229800 |
| H | -4.07899500 | -3.94390600 | -1.23603000 |
| H | -1.46917400 | -2.45287500 | -4.29379900 |
| H | -3.17565100 | -4.07956700 | -3.53831400 |
| C | -2.69924400 | 1.27788100  | -0.22505300 |
| C | -3.99301400 | 0.90913100  | -0.59517000 |
| C | -2.42837200 | 2.62272300  | 0.04696500  |
| C | -4.99574200 | 1.86634400  | -0.69023000 |
| H | -4.23305200 | -0.12119100 | -0.82086700 |
| C | -3.43234600 | 3.57613300  | -0.05367400 |
| H | -1.43313400 | 2.93180900  | 0.34231400  |
| C | -4.71824800 | 3.20014000  | -0.42225500 |
| H | -5.99409600 | 1.56531800  | -0.98257400 |
| H | -3.20670200 | 4.61420500  | 0.15734500  |
| H | -5.50035800 | 3.94514800  | -0.50390300 |
| H | -0.30848400 | 1.65835300  | -1.22005000 |

59

TS3, E(SCF) = -1705.09062605, E(ZPE) = -1704.623647, E(G) = -1704.683123 a.u.

|   |             |             |             |
|---|-------------|-------------|-------------|
| C | 5.37716200  | -2.53738100 | -0.41372100 |
| C | 4.03281800  | -2.49660100 | -0.69466200 |
| C | 3.32868400  | -1.27791800 | -0.64965800 |
| C | 3.99678100  | -0.07274400 | -0.32267500 |
| C | 5.37654100  | -0.15207500 | -0.03546000 |
| C | 6.05057000  | -1.35162600 | -0.07834400 |
| C | 1.91580100  | -1.25059300 | -0.90354900 |
| C | 3.25938400  | 1.18349300  | -0.31931600 |
| C | 1.85990000  | 1.17968500  | -0.59069600 |
| C | 1.20560900  | -0.07076600 | -0.77800800 |
| C | 1.18340800  | 2.41449100  | -0.71322700 |
| H | 0.13947100  | 2.41381100  | -0.99666200 |
| C | 1.83707000  | 3.60613700  | -0.51103700 |
| C | 3.20179800  | 3.61282100  | -0.18431400 |
| C | 3.89243300  | 2.42418500  | -0.10631800 |
| H | 5.91633000  | -3.47631000 | -0.44625300 |
| H | 3.48602500  | -3.39563200 | -0.95103100 |
| H | 5.92807500  | 0.74036600  | 0.22775100  |
| H | 7.10954800  | -1.37843600 | 0.14839300  |
| H | 1.29925000  | 4.54130000  | -0.61502200 |
| H | 3.71705300  | 4.55064000  | -0.01789600 |
| H | 4.95176200  | 2.45580000  | 0.11133400  |
| O | 1.19885700  | -2.29909000 | -1.23673200 |
| N | -0.15693000 | -0.34477600 | -1.10082800 |
| P | -1.44769300 | -0.16180400 | -0.09776500 |
| C | -1.99594800 | 1.55406600  | 0.10413200  |
| C | -1.51584400 | 2.34276800  | 1.14955900  |
| C | -2.82493100 | 2.10774400  | -0.87083100 |
| C | -1.87225400 | 3.68188300  | 1.21970700  |
| H | -0.85122800 | 1.92287700  | 1.89552200  |
| C | -3.17332100 | 3.44967700  | -0.79687200 |
| H | -3.19572500 | 1.49778300  | -1.68688200 |
| C | -2.69867700 | 4.23462500  | 0.24727300  |
| H | -1.49885500 | 4.29517400  | 2.03018400  |
| H | -3.81812100 | 3.87983200  | -1.55290700 |
| H | -2.97397700 | 5.28078800  | 0.30388200  |
| C | -1.21881300 | -0.86387300 | 1.56602900  |
| C | -2.01342400 | -0.47143400 | 2.64511400  |
| C | -0.25802100 | -1.86211100 | 1.72885200  |
| C | -1.84164000 | -1.07691600 | 3.88206100  |
| H | -2.76652000 | 0.29809800  | 2.52460000  |
| C | -0.08772300 | -2.45676600 | 2.97307100  |
| H | 0.34538800  | -2.18710400 | 0.88867200  |

|   |             |             |             |
|---|-------------|-------------|-------------|
| C | -0.87597000 | -2.06416200 | 4.04740500  |
| H | -2.45982300 | -0.77470600 | 4.71818600  |
| H | 0.66210000  | -3.22763900 | 3.10031300  |
| H | -0.74039700 | -2.52914700 | 5.01642200  |
| C | -2.79186000 | -1.06579500 | -0.91743900 |
| C | -4.00127500 | -1.24087200 | -0.24458300 |
| C | -2.62442700 | -1.56823000 | -2.20522500 |
| C | -5.03899800 | -1.92397000 | -0.86133500 |
| H | -4.13993000 | -0.84519200 | 0.75539400  |
| C | -3.66850700 | -2.25457600 | -2.81462900 |
| H | -1.68970500 | -1.42288600 | -2.73097900 |
| C | -4.87209900 | -2.43235900 | -2.14567000 |
| H | -5.97772500 | -2.06061600 | -0.33934600 |
| H | -3.53833000 | -2.64770100 | -3.81515800 |
| H | -5.68355100 | -2.96624900 | -2.62505300 |
| H | 0.13658600  | -1.53647800 | -1.31113900 |

59

2b, E(SCF) = -1705.11277779, E(ZPE) = -1704.642919, E(G) = -1704.703144 a.u.

|   |             |             |             |
|---|-------------|-------------|-------------|
| C | -4.11983500 | -3.19768800 | -0.08117300 |
| C | -2.88022500 | -2.60898400 | -0.14286000 |
| C | -2.75903200 | -1.20770000 | -0.22316500 |
| C | -3.91352800 | -0.38491400 | -0.23501800 |
| C | -5.16928200 | -1.02524300 | -0.17226400 |
| C | -5.27294100 | -2.39543200 | -0.09539800 |
| C | -1.47066700 | -0.58842900 | -0.28067000 |
| C | -3.76970400 | 1.06146200  | -0.32320300 |
| C | -2.47041500 | 1.64019400  | -0.36478300 |
| C | -1.34702100 | 0.76689500  | -0.35217200 |
| C | -2.33308500 | 3.04389800  | -0.44268900 |
| H | -1.34456200 | 3.48587800  | -0.48281200 |
| C | -3.43947500 | 3.85812600  | -0.46756200 |
| C | -4.72458200 | 3.29659900  | -0.41982300 |
| C | -4.87854400 | 1.93083700  | -0.34696200 |
| H | -4.21093200 | -4.27542000 | -0.01972700 |
| H | -1.97631100 | -3.20545600 | -0.13179300 |
| H | -6.07776900 | -0.43830900 | -0.17846500 |
| H | -6.25171800 | -2.85668300 | -0.04460300 |
| H | -3.31865600 | 4.93310900  | -0.52580200 |
| H | -5.59743500 | 3.93730400  | -0.43870100 |
| H | -5.88095600 | 1.52585300  | -0.31336500 |
| O | -0.32589400 | -1.25343400 | -0.28739500 |
| N | 0.00322600  | 1.14251300  | -0.39043900 |
| P | 1.17355800  | -0.03999200 | -0.03504800 |
| C | 1.24839900  | -0.69341900 | 1.66881200  |
| C | 0.63657600  | 0.04836400  | 2.67657200  |
| C | 1.85122200  | -1.91238100 | 1.96441100  |
| C | 0.63156500  | -0.43101000 | 3.98147200  |
| H | 0.16858100  | 1.00082500  | 2.44815700  |
| C | 1.85311300  | -2.38034400 | 3.27287400  |
| H | 2.31293300  | -2.50199100 | 1.18111300  |
| C | 1.24398900  | -1.64195800 | 4.28142500  |
| H | 0.15161300  | 0.14452200  | 4.76359100  |
| H | 2.32868400  | -3.32612000 | 3.50265200  |
| H | 1.24317000  | -2.01214500 | 5.29930200  |
| C | 2.53624200  | 1.26467800  | 0.08552900  |
| C | 3.26989600  | 1.52871800  | 1.23998900  |
| C | 2.83273100  | 1.99447300  | -1.07196200 |
| C | 4.26887100  | 2.50046200  | 1.24166400  |
| H | 3.07866800  | 0.97766900  | 2.15231900  |
| C | 3.82199900  | 2.96712200  | -1.07187500 |
| H | 2.28908600  | 1.79212400  | -1.99024100 |
| C | 4.54528900  | 3.22237900  | 0.08985000  |
| H | 4.82961400  | 2.68980900  | 2.14931600  |
| H | 4.03607200  | 3.52017200  | -1.97869300 |
| H | 5.32273100  | 3.97710500  | 0.09255500  |
| C | 2.02873300  | -1.04241000 | -1.31393300 |
| C | 3.36839900  | -1.38215200 | -1.13008500 |
| C | 1.37841200  | -1.39876100 | -2.49198600 |
| C | 4.04136600  | -2.10676700 | -2.10543100 |
| H | 3.89173300  | -1.08596700 | -0.22748500 |
| C | 2.06741400  | -2.08868400 | -3.48231900 |
| H | 0.33789900  | -1.13834500 | -2.63538500 |
| C | 3.39408500  | -2.45225900 | -3.28644800 |
| H | 5.07547100  | -2.38733600 | -1.94754500 |
| H | 1.56188200  | -2.34857600 | -4.40430100 |
| H | 3.92472400  | -3.00125400 | -4.05493200 |



H 0.26689600 2.10896700 -0.26210900

59

3b, E(SCF) = -1705.10683351, E(ZPE) = -1704.637960, E(G) = -1704.698926 a.u.

|   |             |             |             |
|---|-------------|-------------|-------------|
| C | 4.84814300  | -2.75430200 | -0.06743500 |
| C | 3.51455900  | -2.41892700 | -0.04972500 |
| C | 3.10859900  | -1.06658800 | -0.00340400 |
| C | 4.09067900  | -0.04852500 | 0.01778800  |
| C | 5.44702100  | -0.42511900 | -0.00339100 |
| C | 5.82442800  | -1.74944400 | -0.03930600 |
| C | 1.71898200  | -0.72255300 | 0.05299800  |
| C | 3.65142600  | 1.33838200  | 0.02949700  |
| C | 2.26834900  | 1.63341300  | 0.05195600  |
| C | 1.26361800  | 0.57050200  | 0.06879300  |
| C | 1.85237800  | 2.97945300  | 0.06054700  |
| H | 0.79045800  | 3.18513100  | 0.07181000  |
| C | 2.76550600  | 4.00808600  | 0.05406800  |
| C | 4.13664800  | 3.72042800  | 0.03744500  |
| C | 4.56460400  | 2.41295200  | 0.02627200  |
| H | 5.14306500  | -3.79610700 | -0.10643200 |
| H | 2.76631100  | -3.20056100 | -0.08677800 |
| H | 6.22056900  | 0.33082800  | 0.01271400  |
| H | 6.87526500  | -2.01123600 | -0.05200900 |
| H | 2.42585000  | 5.03680200  | 0.06002700  |
| H | 4.86146500  | 4.52545300  | 0.03193900  |
| H | 5.62803800  | 2.21817000  | 0.01042700  |
| O | 0.78488500  | -1.74049200 | 0.02497400  |
| N | -0.04776200 | 0.97163800  | 0.12808800  |
| P | -1.38437100 | 0.09605000  | 0.01832000  |
| C | -1.61974600 | -0.87387200 | -1.51318000 |
| C | -1.59900600 | -0.16289700 | -2.71290800 |
| C | -1.78811500 | -2.25518700 | -1.52602900 |
| C | -1.75066700 | -0.83228000 | -3.91993500 |
| H | -1.46420600 | 0.91386000  | -2.70521000 |
| C | -1.94676000 | -2.92061300 | -2.73531200 |
| H | -1.78388400 | -2.81659200 | -0.60025100 |
| C | -1.92939300 | -2.21117800 | -3.93075300 |
| H | -1.73222400 | -0.27706400 | -4.84956800 |
| H | -2.08091200 | -3.99531600 | -2.74310000 |
| H | -2.05232100 | -2.73295500 | -4.87208400 |
| C | -2.74860700 | 1.30975200  | -0.00053200 |
| C | -3.98726300 | 0.97573500  | -0.54678200 |
| C | -2.56348600 | 2.55853200  | 0.58945200  |
| C | -5.03341000 | 1.88855300  | -0.50440500 |
| H | -4.13847200 | 0.00863100  | -1.01330200 |
| C | -3.61258500 | 3.46862000  | 0.62795000  |
| H | -1.59826100 | 2.81447400  | 1.00890200  |
| C | -4.84701800 | 3.13464600  | 0.08317900  |
| H | -5.99247200 | 1.62698500  | -0.93441200 |
| H | -3.46476900 | 4.44020500  | 1.08364400  |
| H | -5.66340400 | 3.84610900  | 0.11362400  |
| C | -1.76221200 | -0.96903100 | 1.45707000  |
| C | -2.96616000 | -1.66571200 | 1.54940900  |
| C | -0.85387500 | -1.00544600 | 2.51183700  |
| C | -3.24693500 | -2.41429600 | 2.68497900  |
| H | -3.68458400 | -1.63100300 | 0.73773200  |
| C | -1.14045300 | -1.75216000 | 3.64850200  |
| H | 0.07583600  | -0.45053400 | 2.44331100  |
| C | -2.33470800 | -2.45832700 | 3.73364000  |
| H | -4.17951000 | -2.96095900 | 2.75159100  |
| H | -0.43181600 | -1.78055700 | 4.46709200  |
| H | -2.55789500 | -3.04078000 | 4.61932400  |
| H | 0.91146600  | -2.32685300 | 0.78609900  |

84

RP1, E(SCF) = -2373.97352359, E(ZPE) = -2373.309395, E(G) = -2373.386900 a.u.

|   |             |             |             |
|---|-------------|-------------|-------------|
| C | -6.71381500 | -1.27714700 | 1.97521900  |
| C | -5.57377400 | -0.55482000 | 1.69309000  |
| C | -4.56800000 | -1.09404200 | 0.87993900  |
| C | -4.70339100 | -2.38815800 | 0.34652900  |
| C | -5.87381200 | -3.10490200 | 0.64559100  |
| C | -6.86037200 | -2.56201300 | 1.44570100  |
| C | -3.36886500 | -0.28374400 | 0.62653300  |
| C | -3.63832300 | -2.93214800 | -0.50532100 |
| C | -2.49087400 | -2.15328600 | -0.78774300 |
| C | -2.33295700 | -0.81668100 | -0.23124200 |
| C | -1.49370400 | -2.68225400 | -1.62692500 |

|   |             |             |             |
|---|-------------|-------------|-------------|
| H | -0.63353300 | -2.06867000 | -1.85362600 |
| C | -1.60276700 | -3.94817100 | -2.16050000 |
| C | -2.72658000 | -4.72456000 | -1.86978600 |
| C | -3.72323100 | -4.21841100 | -1.05840600 |
| H | -7.48847600 | -0.85418100 | 2.60284300  |
| H | -5.43250600 | 0.44193600  | 2.09112600  |
| H | -6.02210000 | -4.10134700 | 0.25327300  |
| H | -7.75162300 | -3.13869000 | 1.66139000  |
| H | -0.82226500 | -4.33574300 | -2.80374000 |
| H | -2.82298000 | -5.72188800 | -2.28088900 |
| H | -4.58340100 | -4.84062400 | -0.85418600 |
| O | -3.22785900 | 0.84259200  | 1.14478100  |
| N | -1.21404100 | -0.13167300 | -0.51825700 |
| P | -0.91681400 | 1.44097900  | -0.14344200 |
| C | 0.59988400  | 1.84949600  | -1.08186800 |
| C | 0.49890300  | 2.11083600  | -2.45086100 |
| C | 1.85035100  | 1.88061200  | -0.46749100 |
| C | 1.63470100  | 2.40967800  | -3.18913400 |
| H | -0.46554200 | 2.09111400  | -2.94481300 |
| C | 2.98553900  | 2.18753200  | -1.21064100 |
| H | 1.95221500  | 1.66270400  | 0.58898400  |
| C | 2.87918600  | 2.45583600  | -2.56801300 |
| H | 1.54699300  | 2.61380400  | -4.24917300 |
| H | 3.95241600  | 2.21294300  | -0.72234400 |
| H | 3.76421100  | 2.69775800  | -3.14434200 |
| C | -2.19377200 | 2.58287000  | -0.77198900 |
| C | -2.92708300 | 2.18795300  | -1.89034900 |
| C | -2.44231800 | 3.81383400  | -0.17229000 |
| C | -3.90181700 | 3.03076600  | -2.40936700 |
| H | -2.74591300 | 1.22304900  | -2.35091000 |
| C | -3.41816800 | 4.65139300  | -0.69730200 |
| H | -1.89906600 | 4.12256900  | 0.71103000  |
| C | -4.14692800 | 4.26311700  | -1.81506700 |
| H | -4.47183600 | 2.72131100  | -3.27680400 |
| H | -3.61187300 | 5.60692700  | -0.22557500 |
| H | -4.90816300 | 4.91868900  | -2.21994400 |
| C | -0.48267200 | 1.77070400  | 1.59422500  |
| C | 0.08713400  | 2.98713700  | 1.96823000  |
| C | -0.64686800 | 0.75779000  | 2.53550800  |
| C | 0.45813200  | 3.19790100  | 3.29015800  |
| H | 0.26018500  | 3.76529000  | 1.23347700  |
| C | -0.25755100 | 0.96719600  | 3.85140100  |
| H | -1.07763000 | -0.19201400 | 2.24144800  |
| C | 0.28671900  | 2.18906200  | 4.23044100  |
| H | 0.89242200  | 4.14646000  | 3.58054000  |
| H | -0.38160700 | 0.17642700  | 4.58078000  |
| H | 0.58498200  | 2.35266900  | 5.25890700  |
| H | 0.63439500  | -1.13441600 | -0.07143300 |
| C | 7.07042800  | -1.00550200 | 2.57331200  |
| C | 5.70202200  | -1.15054900 | 2.65937100  |
| C | 4.90828900  | -1.14769500 | 1.50449400  |
| C | 5.49956100  | -1.00581200 | 0.23443200  |
| C | 6.89485300  | -0.85560000 | 0.17276600  |
| C | 7.66684300  | -0.85748200 | 1.31837700  |
| C | 3.45562100  | -1.29829700 | 1.65548100  |
| C | 4.65516200  | -0.99869000 | -0.96776900 |
| C | 3.25350200  | -1.15483500 | -0.84964600 |
| C | 2.65184500  | -1.25900300 | 0.45522000  |
| C | 2.45467000  | -1.14709100 | -2.00869100 |
| H | 1.38059100  | -1.25020400 | -1.92825900 |
| C | 3.01555000  | -1.00489200 | -3.25798600 |
| C | 4.39854800  | -0.85093300 | -3.37974700 |
| C | 5.19750700  | -0.85202400 | -2.25266300 |
| H | 7.67841700  | -1.00616800 | 3.46960500  |
| H | 5.21230600  | -1.26605500 | 3.61811700  |
| H | 7.39131900  | -0.73759900 | -0.78034900 |
| H | 8.74089500  | -0.74103800 | 1.23860800  |
| H | 2.38465400  | -1.00144800 | -4.13827300 |
| H | 4.84963500  | -0.73253800 | -4.35727100 |
| H | 6.26410400  | -0.73128200 | -2.38132400 |
| O | 2.90884500  | -1.42272500 | 2.76777300  |
| N | 1.33061100  | -1.33837100 | 0.63988800  |
| H | 1.01325700  | -1.37289600 | 1.60157200  |

84

RP2, E(SCF) = -2373.98024235, E(ZPE) = -2373.316806, E(G) = -2373.395706 a.u.  
C -0.24318700 4.36867300 2.37019800

|   |             |             |             |
|---|-------------|-------------|-------------|
| C | 0.06288900  | 3.08438100  | 1.97342800  |
| C | 1.12460200  | 2.84106700  | 1.08893400  |
| C | 1.89406600  | 3.91087300  | 0.59360700  |
| C | 1.56482000  | 5.20944400  | 1.01367800  |
| C | 0.51429400  | 5.43635900  | 1.88192300  |
| C | 1.38937300  | 1.46216400  | 0.67398100  |
| C | 3.01512100  | 3.63586100  | -0.31378700 |
| C | 3.29796900  | 2.30718600  | -0.70273000 |
| C | 2.49747300  | 1.19205300  | -0.20966900 |
| C | 4.37855500  | 2.05483200  | -1.56620600 |
| H | 4.58463700  | 1.03019200  | -1.84645200 |
| C | 5.16186500  | 3.08238400  | -2.04521000 |
| C | 4.88232700  | 4.39780800  | -1.66714300 |
| C | 3.82616400  | 4.66358400  | -0.81786400 |
| H | -1.06249500 | 4.54875600  | 3.05504000  |
| H | -0.50926900 | 2.24078000  | 2.34079700  |
| H | 2.13093600  | 6.05959300  | 0.65878600  |
| H | 0.28241800  | 6.44976500  | 2.18621900  |
| H | 5.99095200  | 2.86982600  | -2.70895800 |
| H | 5.49231000  | 5.21291300  | -2.03667200 |
| H | 3.63541400  | 5.69079200  | -0.54010700 |
| O | 0.67364300  | 0.50927500  | 1.07316600  |
| N | 2.80984600  | -0.03765900 | -0.61832800 |
| P | 2.14282600  | -1.45289800 | -0.13950600 |
| C | 2.28673600  | -1.84626700 | 1.63165100  |
| C | 1.18030200  | -2.09871500 | 2.43583600  |
| C | 3.57160800  | -1.88172900 | 2.17219900  |
| C | 1.35946900  | -2.39931100 | 3.77929700  |
| H | 0.18306100  | -2.05695200 | 2.01904400  |
| C | 3.74410200  | -2.16893700 | 3.51992300  |
| H | 4.43534500  | -1.68557600 | 1.54546700  |
| C | 2.63940100  | -2.43270500 | 4.32134300  |
| H | 0.49806700  | -2.60375300 | 4.40313200  |
| H | 4.74158700  | -2.19188400 | 3.94082800  |
| H | 2.77650100  | -2.66360600 | 5.37076000  |
| C | 3.16915300  | -2.70892700 | -0.97349500 |
| C | 3.82261500  | -2.38641300 | -2.16109800 |
| C | 3.24433900  | -4.00551500 | -0.46541900 |
| C | 4.55422000  | -3.35756300 | -2.83310300 |
| H | 3.76284100  | -1.37803600 | -2.55130000 |
| C | 3.97636700  | -4.97227600 | -1.14237200 |
| H | 2.74033300  | -4.26361500 | 0.45923900  |
| C | 4.63177300  | -4.64904400 | -2.32492600 |
| H | 5.06637300  | -3.10365900 | -3.75300800 |
| H | 4.03863600  | -5.97682000 | -0.74261200 |
| H | 5.20457600  | -5.40435700 | -2.84914800 |
| C | 0.45748600  | -1.75334100 | -0.75888000 |
| C | -0.19186600 | -2.95812600 | -0.49745400 |
| C | -0.14605300 | -0.78715500 | -1.55938600 |
| C | -1.46223600 | -3.18001600 | -1.01556800 |
| H | 0.28431600  | -3.71906300 | 0.11123700  |
| C | -1.40466300 | -1.02565500 | -2.09372800 |
| H | 0.36054800  | 0.15005900  | -1.76168900 |
| C | -2.06730800 | -2.21555100 | -1.81380100 |
| H | -1.97571900 | -4.10884800 | -0.79949300 |
| H | -1.87490200 | -0.27348100 | -2.71586700 |
| H | -3.05685500 | -2.39131600 | -2.21949200 |
| C | -7.78294000 | -1.65190200 | -0.01852500 |
| C | -6.55786500 | -1.81635700 | 0.59215400  |
| C | -5.50463100 | -0.92890400 | 0.33368800  |
| C | -5.68559200 | 0.15143700  | -0.55090100 |
| C | -6.94217200 | 0.29768100  | -1.16167000 |
| C | -7.97240100 | -0.58480400 | -0.90047700 |
| C | -4.22413900 | -1.14938200 | 1.01568500  |
| C | -4.57089400 | 1.07120900  | -0.81727400 |
| C | -3.33371300 | 0.89447500  | -0.15400000 |
| C | -3.14961700 | -0.22485900 | 0.73491100  |
| C | -2.27299200 | 1.78310700  | -0.41310100 |
| H | -1.31753600 | 1.64400200  | 0.07752500  |
| C | -2.42516600 | 2.83465500  | -1.28934200 |
| C | -3.64621000 | 3.01517700  | -1.94457900 |
| C | -4.69576300 | 2.14883200  | -1.70603100 |
| H | -8.59271700 | -2.34185800 | 0.18434800  |
| H | -6.38298900 | -2.63223300 | 1.28197700  |
| H | -7.12525200 | 1.11343500  | -1.84703700 |
| H | -8.93158900 | -0.44455600 | -1.38389900 |
| H | -1.59903300 | 3.51153500  | -1.47191400 |

|   |             |             |             |
|---|-------------|-------------|-------------|
| H | -3.77519300 | 3.83522800  | -2.63993400 |
| H | -5.62722400 | 2.31456900  | -2.22916200 |
| O | -4.03891900 | -2.10085200 | 1.79963900  |
| N | -1.99615400 | -0.47450300 | 1.35442400  |
| H | -1.97914000 | -1.29760300 | 1.94416300  |
| H | -1.12106900 | 0.01824300  | 1.18749400  |

83

Al, E(SCF) = -2372.66210771, E(ZPE) = nofreq, E(G) = nofreq a.u.

|   |             |             |             |
|---|-------------|-------------|-------------|
| C | -0.25167400 | 4.36840300  | 2.36913300  |
| C | 0.05556200  | 3.08386600  | 1.97405500  |
| C | 1.11665600  | 2.84046600  | 1.08884100  |
| C | 1.88429600  | 3.91043500  | 0.59104300  |
| C | 1.55389700  | 5.20925900  | 1.00942400  |
| C | 0.50399400  | 5.43624800  | 1.87840300  |
| C | 1.38268400  | 1.46124000  | 0.67577000  |
| C | 3.00474600  | 3.63537300  | -0.31708300 |
| C | 3.28881700  | 2.30643800  | -0.70424100 |
| C | 2.49019700  | 1.19110100  | -0.20860600 |
| C | 4.36881600  | 2.05405400  | -1.56844200 |
| H | 4.57586100  | 1.02922900  | -1.84729900 |
| C | 5.15037100  | 3.08181100  | -2.04986500 |
| C | 4.86961500  | 4.39748300  | -1.67356600 |
| C | 3.81400800  | 4.66329700  | -0.82360800 |
| H | -1.07049200 | 4.54855600  | 3.05454300  |
| H | -0.51518200 | 2.24014300  | 2.34333600  |
| H | 2.11860400  | 6.05954200  | 0.65261600  |
| H | 0.27119300  | 6.44984500  | 2.18135400  |
| H | 5.97902900  | 2.86922800  | -2.71414000 |
| H | 5.47821700  | 5.21275300  | -2.04500200 |
| H | 3.62228900  | 5.69070400  | -0.54726000 |
| O | 0.66853400  | 0.50810300  | 1.07718800  |
| N | 2.80365200  | -0.03886700 | -0.61566500 |
| P | 2.13886000  | -1.45416900 | -0.13393900 |
| C | 2.28508600  | -1.84458900 | 1.63768100  |
| C | 1.17979600  | -2.09713000 | 2.44340800  |
| C | 3.57056000  | -1.87763500 | 2.17695000  |
| C | 1.36072200  | -2.39540400 | 3.78715100  |
| H | 0.18207300  | -2.05723800 | 2.02758600  |
| C | 3.74480200  | -2.16252200 | 3.52494200  |
| H | 4.43340700  | -1.68140700 | 1.54901600  |
| C | 2.64125500  | -2.42638500 | 4.32791900  |
| H | 0.50021800  | -2.59992200 | 4.41219800  |
| H | 4.74275000  | -2.18359100 | 3.94484700  |
| H | 2.77972500  | -2.65547500 | 5.37755300  |
| C | 3.16585900  | -2.71024600 | -0.96702700 |
| C | 3.81769500  | -2.38879300 | -2.15581100 |
| C | 3.24315800  | -4.00594500 | -0.45700200 |
| C | 4.54979200  | -3.36009900 | -2.82705500 |
| H | 3.75628300  | -1.38110200 | -2.54752700 |
| C | 3.97566700  | -4.97286900 | -1.13320200 |
| H | 2.74042700  | -4.26321300 | 0.46858100  |
| C | 4.62945100  | -4.65068700 | -2.31694000 |
| H | 5.06068000  | -3.10700900 | -3.74788700 |
| H | 4.03957900  | -5.97670900 | -0.73193600 |
| H | 5.20263500  | -5.40611900 | -2.84057400 |
| C | 0.45324900  | -1.75764000 | -0.75109200 |
| C | -0.19435700 | -2.96280700 | -0.48710900 |
| C | -0.15230100 | -0.79344700 | -1.55248200 |
| C | -1.46499100 | -3.18706000 | -1.00355600 |
| H | 0.28338600  | -3.72220800 | 0.12227700  |
| C | -1.41117200 | -1.03432100 | -2.08514300 |
| H | 0.35294200  | 0.14406800  | -1.75677600 |
| C | -2.07207000 | -2.22458600 | -1.80266800 |
| H | -1.97711300 | -4.11618000 | -0.78549600 |
| H | -1.88297500 | -0.28369700 | -2.70796900 |
| H | -3.06182000 | -2.40219500 | -2.20705600 |
| C | -7.78652400 | -1.66511400 | -0.00234400 |
| C | -6.56061700 | -1.82711500 | 0.60731900  |
| C | -5.50873800 | -0.93878100 | 0.34637300  |
| C | -5.69193700 | 0.13995200  | -0.53971700 |
| C | -6.94932700 | 0.28370400  | -1.14940900 |
| C | -7.97820400 | -0.59963000 | -0.88576700 |
| C | -4.22727100 | -1.15662700 | 1.02738400  |
| C | -4.57864200 | 1.06066700  | -0.80868500 |
| C | -3.34055900 | 0.88648400  | -0.14641900 |
| C | -3.15417300 | -0.23123200 | 0.74404900  |

|   |             |             |             |
|---|-------------|-------------|-------------|
| C | -2.28119600 | 1.77600500  | -0.40801100 |
| H | -1.32506200 | 1.63883600  | 0.08184000  |
| C | -2.43556400 | 2.82599300  | -1.28573700 |
| C | -3.65750600 | 3.00399700  | -1.93998800 |
| C | -4.70575000 | 2.13674500  | -1.69899600 |
| H | -8.59524500 | -2.35574000 | 0.20244800  |
| H | -6.38402800 | -2.64169600 | 1.29823500  |
| H | -7.13411500 | 1.09816000  | -1.83586100 |
| H | -8.93806400 | -0.46131100 | -1.36841200 |
| H | -1.61044900 | 3.50359600  | -1.47022400 |
| H | -3.78821300 | 3.82280100  | -2.63649000 |
| H | -5.63795500 | 2.30052400  | -2.22141800 |
| O | -4.04007500 | -2.10664100 | 1.81263200  |
| N | -1.99976400 | -0.47849600 | 1.36275500  |
| H | -1.12545600 | 0.01505700  | 1.19414600  |

**RADICAL COMPLEX FORMATION:**

58

R\_N-Rad, E(SCF) = -1704.43395958, E(ZPE) = -1703.978495, E(G) = -1704.044465 a.u.

|   |             |             |             |
|---|-------------|-------------|-------------|
| C | 4.61126900  | -3.14911900 | -0.78543000 |
| C | 3.51588500  | -2.57387100 | -1.40161600 |
| C | 3.15323500  | -1.25783400 | -1.11236200 |
| C | 3.87833400  | -0.49279400 | -0.18357500 |
| C | 4.98860200  | -1.09105300 | 0.41919200  |
| C | 5.34871300  | -2.39673200 | 0.12365100  |
| C | 1.97654400  | -0.70733600 | -1.81693100 |
| C | 3.45423300  | 0.88442300  | 0.16631100  |
| C | 2.38965100  | 1.50200700  | -0.50530800 |
| C | 1.69522000  | 0.78665400  | -1.60258500 |
| C | 1.96687600  | 2.78464300  | -0.15402700 |
| H | 1.13120600  | 3.23171100  | -0.67997300 |
| C | 2.59843300  | 3.47327500  | 0.86636400  |
| C | 3.65407500  | 2.87136900  | 1.54352000  |
| C | 4.07215300  | 1.59661600  | 1.19971600  |
| H | 4.89414700  | -4.16903500 | -1.01260200 |
| H | 2.92655200  | -3.13049400 | -2.11934700 |
| H | 5.59168600  | -0.54121300 | 1.12734700  |
| H | 6.21523200  | -2.83019400 | 0.60784000  |
| H | 2.26580500  | 4.46663100  | 1.13940700  |
| H | 4.15174200  | 3.39509300  | 2.35035500  |
| H | 4.88351300  | 1.15342300  | 1.75937000  |
| O | 1.27980400  | -1.35715400 | -2.55643400 |
| N | 0.89565300  | 1.33840900  | -2.38883600 |
| P | -1.91816600 | -0.40492600 | -0.75451100 |
| C | -0.71102900 | -0.17234200 | 0.62454500  |
| C | -0.69631900 | 0.93894200  | 1.46475500  |
| C | 0.24528000  | -1.17639900 | 0.81215700  |
| C | 0.25222500  | 1.04281800  | 2.47900600  |
| H | -1.42627800 | 1.72948000  | 1.33708200  |
| C | 1.18276800  | -1.07814100 | 1.83182200  |
| H | 0.24666100  | -2.04856900 | 0.16496900  |
| C | 1.19059800  | 0.03605500  | 2.66642900  |
| H | 0.25415100  | 1.91441800  | 3.12311400  |
| H | 1.91389400  | -1.86671200 | 1.96847500  |
| H | 1.92757600  | 0.11955600  | 3.45623200  |
| C | -2.89719900 | 1.16127400  | -0.65765200 |
| C | -2.44665300 | 2.23974800  | -1.42231500 |
| C | -4.03395200 | 1.32000400  | 0.13408200  |
| C | -3.10931900 | 3.46083500  | -1.38028800 |
| H | -1.56979900 | 2.12405200  | -2.05156500 |
| C | -4.70323700 | 2.53856400  | 0.16649400  |
| H | -4.40180100 | 0.49462900  | 0.73253700  |
| C | -4.24083300 | 3.61132800  | -0.58671100 |
| H | -2.74769500 | 4.29085200  | -1.97546400 |
| H | -5.58673000 | 2.64884500  | 0.78409600  |
| H | -4.76390800 | 4.55959200  | -0.55936100 |
| C | -3.09864000 | -1.61224000 | 0.00034100  |
| C | -3.13373800 | -1.93217700 | 1.35739100  |
| C | -4.01730300 | -2.21522700 | -0.86164700 |
| C | -4.07615100 | -2.83277800 | 1.84303500  |
| H | -2.42995300 | -1.47649000 | 2.04431700  |
| C | -4.96657400 | -3.10512100 | -0.37427600 |
| H | -3.99233200 | -1.98482600 | -1.92194200 |
| C | -4.99621500 | -3.41688800 | 0.98061800  |
| H | -4.09329700 | -3.07324700 | 2.89945800  |
| H | -5.67715200 | -3.56006500 | -1.05392400 |

H -5.73031900 -4.11620100 1.36231500

58

TS1\_N-Rad, E(SCF) = -1704.42197304, E(ZPE) = -1703.966194, E(G) = -1704.027695 a.u.

|   |             |             |             |
|---|-------------|-------------|-------------|
| C | -3.50085300 | -3.34951700 | 0.21407200  |
| C | -2.45013900 | -2.74383500 | -0.44906100 |
| C | -2.46052300 | -1.36737300 | -0.68469300 |
| C | -3.53868800 | -0.57168100 | -0.26220200 |
| C | -4.58927200 | -1.20386400 | 0.41328600  |
| C | -4.57032700 | -2.56920000 | 0.64726400  |
| C | -1.28885000 | -0.76828900 | -1.35776600 |
| C | -3.54146600 | 0.88490900  | -0.52412700 |
| C | -2.38994700 | 1.51845300  | -1.02117900 |
| C | -1.16055800 | 0.73356900  | -1.31964400 |
| C | -2.38918900 | 2.89784500  | -1.24195700 |
| H | -1.49030600 | 3.36273900  | -1.62721400 |
| C | -3.51679200 | 3.65587800  | -0.98592700 |
| C | -4.66775600 | 3.03417000  | -0.50842600 |
| C | -4.67716800 | 1.66864300  | -0.28398400 |
| H | -3.48780900 | -4.41533700 | 0.40383900  |
| H | -1.59666300 | -3.32031800 | -0.78434200 |
| H | -5.43180000 | -0.63148500 | 0.77565400  |
| H | -5.39610500 | -3.02961200 | 1.17606300  |
| H | -3.50640700 | 4.72351700  | -1.16688300 |
| H | -5.56191300 | 3.61405000  | -0.31544600 |
| H | -5.58882200 | 1.21117200  | 0.07492700  |
| O | -0.41234600 | -1.44483800 | -1.86333100 |
| N | -0.03897400 | 1.30437300  | -1.49663700 |
| P | 1.59855600  | 0.11653900  | -0.35248700 |
| C | 2.42807600  | 1.61495800  | 0.28067900  |
| C | 2.63867000  | 1.86151400  | 1.63683200  |
| C | 2.88487300  | 2.53256300  | -0.66688800 |
| C | 3.30248800  | 3.01477700  | 2.03858500  |
| H | 2.28899400  | 1.15438000  | 2.37994400  |
| C | 3.55587300  | 3.67928500  | -0.26237500 |
| H | 2.71162900  | 2.35023500  | -1.72203700 |
| C | 3.76302000  | 3.92196200  | 1.09107000  |
| H | 3.46374300  | 3.20180300  | 3.09334400  |
| H | 3.91207000  | 4.38553800  | -1.00242700 |
| H | 4.28140600  | 4.81914600  | 1.40725200  |
| C | 0.61687300  | -0.53776700 | 1.03773500  |
| C | -0.32874400 | 0.30528500  | 1.63204000  |
| C | 0.65464900  | -1.88425100 | 1.40563100  |
| C | -1.21439200 | -0.18992800 | 2.58157000  |
| H | -0.36857000 | 1.35500900  | 1.36157400  |
| C | -0.23482300 | -2.37478100 | 2.35288300  |
| H | 1.37506100  | -2.55512100 | 0.95318600  |
| C | -1.17641400 | -1.53307900 | 2.93625900  |
| H | -1.94009700 | 0.47530400  | 3.03409100  |
| H | -0.19635200 | -3.42133900 | 2.63065400  |
| H | -1.87469500 | -1.92322100 | 3.66688300  |
| C | 2.97029400  | -1.08193500 | -0.61180700 |
| C | 4.25642800  | -0.86985200 | -0.11245600 |
| C | 2.70817500  | -2.21990100 | -1.37836600 |
| C | 5.25964200  | -1.79960500 | -0.35913400 |
| H | 4.47969500  | 0.01398300  | 0.47293700  |
| C | 3.71277200  | -3.15014800 | -1.61335300 |
| H | 1.71665000  | -2.37382600 | -1.78790500 |
| C | 4.99006500  | -2.94040400 | -1.10645800 |
| H | 6.25425700  | -1.63126200 | 0.03605000  |
| H | 3.49811000  | -4.03341600 | -2.20264900 |
| H | 5.77517900  | -3.66234300 | -1.29568900 |

58

P\_N-Rad (oxazaphospholyl radical), E(SCF) = -1704.49678358, E(ZPE) = -1704.039252, E(G) = -1704.100380 a.u.

|   |             |             |             |
|---|-------------|-------------|-------------|
| C | -4.74326700 | 2.81017800  | -0.05448600 |
| C | -3.41575900 | 2.43941900  | -0.08980400 |
| C | -3.04891100 | 1.08656000  | -0.06854500 |
| C | -4.03605600 | 0.08439400  | -0.02464800 |
| C | -5.38133800 | 0.48625400  | 0.01479200  |
| C | -5.73045700 | 1.82258000  | -0.00196700 |
| C | -1.62035700 | 0.74978100  | -0.11933200 |
| C | -3.63487400 | -1.32761800 | -0.00192400 |
| C | -2.26314600 | -1.66988400 | -0.03699000 |
| C | -1.23278300 | -0.64147700 | -0.07542000 |
| C | -1.88972000 | -3.02629800 | -0.01447500 |

|   |             |             |             |
|---|-------------|-------------|-------------|
| H | -0.83532100 | -3.26920300 | -0.03325600 |
| C | -2.83741400 | -4.02542000 | 0.03021700  |
| C | -4.19388400 | -3.69116800 | 0.05857900  |
| C | -4.57883300 | -2.36499100 | 0.04081200  |
| H | -5.01978800 | 3.85737500  | -0.06825300 |
| H | -2.63004500 | 3.18307100  | -0.13280500 |
| H | -6.17206500 | -0.24981200 | 0.05628200  |
| H | -6.77673100 | 2.10192400  | 0.02732400  |
| H | -2.53136300 | -5.06445900 | 0.04559000  |
| H | -4.94671900 | -4.46906900 | 0.09539100  |
| H | -5.63571100 | -2.13777900 | 0.06435600  |
| O | -0.74181600 | 1.63486400  | -0.19716100 |
| N | 0.04602500  | -1.02778100 | -0.09228100 |
| P | 1.36916500  | -0.07304800 | -0.00620300 |
| C | 1.51771300  | 0.99501200  | 1.46090100  |
| C | 1.64865100  | 2.37697400  | 1.36385400  |
| C | 1.48779200  | 0.37624000  | 2.70946800  |
| C | 1.76332400  | 3.13821100  | 2.51920900  |
| H | 1.64474500  | 2.85784800  | 0.39400300  |
| C | 1.58839800  | 1.14486200  | 3.86217600  |
| H | 1.38802300  | -0.70182800 | 2.78440300  |
| C | 1.73203700  | 2.52403000  | 3.76654200  |
| H | 1.86946800  | 4.21358100  | 2.44517600  |
| H | 1.55877000  | 0.66518900  | 4.83265400  |
| H | 1.81499300  | 3.12201100  | 4.66602600  |
| C | 1.77193200  | 0.84817100  | -1.52488400 |
| C | 2.98447300  | 1.52768100  | -1.62558300 |
| C | 0.90066700  | 0.79982800  | -2.60859200 |
| C | 3.31270200  | 2.17845700  | -2.80785400 |
| H | 3.67107300  | 1.55705100  | -0.78606500 |
| C | 1.23946100  | 1.44322100  | -3.79192800 |
| H | -0.03936300 | 0.26678700  | -2.52811100 |
| C | 2.44143000  | 2.13527700  | -3.89021800 |
| H | 4.25031100  | 2.71501600  | -2.88361000 |
| H | 0.56243600  | 1.40665100  | -4.63644000 |
| H | 2.70041600  | 2.64070300  | -4.81263100 |
| C | 2.73752200  | -1.27200700 | 0.15322500  |
| C | 3.92076100  | -0.92934100 | 0.80606400  |
| C | 2.61783100  | -2.51932900 | -0.45860300 |
| C | 4.97402700  | -1.83428600 | 0.85338200  |
| H | 4.02455300  | 0.03815300  | 1.28370000  |
| C | 3.67375900  | -3.41967700 | -0.40878700 |
| H | 1.69789900  | -2.78410900 | -0.96539100 |
| C | 4.85148100  | -3.07868200 | 0.24698400  |
| H | 5.88844100  | -1.56648100 | 1.36813200  |
| H | 3.57489900  | -4.38945600 | -0.88098800 |
| H | 5.67298200  | -3.78359500 | 0.28782000  |

88

RP\_1\_TEMPO-H, E(SCF) = -2188.23605160, E(ZPE) = nofreq, E(G) = nofreq a.u.

|   |             |             |             |
|---|-------------|-------------|-------------|
| C | 2.93950200  | 3.62736800  | 0.34158700  |
| C | 2.08407000  | 2.54574900  | 0.31245900  |
| C | 0.70041600  | 2.73409100  | 0.17974100  |
| C | 0.16400300  | 4.03363800  | 0.09106900  |
| C | 1.05631700  | 5.11706700  | 0.12029900  |
| C | 2.41845200  | 4.92044300  | 0.24419600  |
| C | -0.16889600 | 1.55643100  | 0.16857900  |
| C | -1.28774300 | 4.21324100  | -0.03523200 |
| C | -2.13946600 | 3.08590500  | -0.03143200 |
| C | -1.59750700 | 1.73662300  | 0.06993700  |
| C | -3.52909900 | 3.26723800  | -0.14574200 |
| H | -4.16349100 | 2.39078600  | -0.14571800 |
| C | -4.07478000 | 4.52776900  | -0.25581800 |
| C | -3.23660000 | 5.64556500  | -0.25803000 |
| C | -1.86940100 | 5.48543200  | -0.14832900 |
| H | 4.00768500  | 3.47406700  | 0.44150200  |
| H | 2.47364700  | 1.53528500  | 0.37965200  |
| H | 0.68690800  | 6.13092000  | 0.05300400  |
| H | 3.08141700  | 5.77688300  | 0.26585400  |
| H | -5.14749000 | 4.65089900  | -0.34251300 |
| H | -3.65520700 | 6.64057100  | -0.34660200 |
| H | -1.24616800 | 6.36884400  | -0.15450800 |
| O | 0.28639100  | 0.39098900  | 0.26554600  |
| N | -2.45185600 | 0.71275600  | 0.07347800  |
| P | -2.10643800 | -0.88674100 | 0.04909100  |
| C | -3.74827400 | -1.65577800 | -0.16462900 |
| C | -4.03621100 | -2.51312000 | -1.22177100 |

|   |             |             |             |
|---|-------------|-------------|-------------|
| C | -4.73078700 | -1.36362400 | 0.78387400  |
| C | -5.30686100 | -3.07069000 | -1.33416900 |
| H | -3.28200700 | -2.74876500 | -1.96277100 |
| C | -5.99402100 | -1.92307100 | 0.66838000  |
| H | -4.50599500 | -0.69952400 | 1.61176400  |
| C | -6.28275300 | -2.77755000 | -0.39289400 |
| H | -5.52925500 | -3.73399400 | -2.16084000 |
| H | -6.75392400 | -1.69625600 | 1.40605900  |
| H | -7.27039200 | -3.21340900 | -0.48303300 |
| C | -1.13469100 | -1.45724700 | -1.38039600 |
| C | -1.24861500 | -0.72992900 | -2.56421200 |
| C | -0.38997600 | -2.63216700 | -1.34687500 |
| C | -0.62206500 | -1.18679800 | -3.71648100 |
| H | -1.83143300 | 0.18426900  | -2.58993800 |
| C | 0.22556700  | -3.08864800 | -2.50716700 |
| H | -0.28228500 | -3.19460100 | -0.42798300 |
| C | 0.10595900  | -2.37128100 | -3.69122300 |
| H | -0.70893700 | -0.62062000 | -4.63566700 |
| H | 0.80184400  | -4.00537700 | -2.48254000 |
| H | 0.58682500  | -2.73050800 | -4.59309500 |
| C | -1.51067800 | -1.58931400 | 1.62205900  |
| C | -1.63384000 | -2.96058100 | 1.84672200  |
| C | -1.02349100 | -0.75679700 | 2.62639300  |
| C | -1.22114400 | -3.50180200 | 3.05733100  |
| H | -2.05361100 | -3.60786700 | 1.08439800  |
| C | -0.62831700 | -1.30207900 | 3.84073500  |
| H | -0.95382500 | 0.31104700  | 2.46545100  |
| C | -0.71591200 | -2.67316700 | 4.05241800  |
| H | -1.30515400 | -4.56824300 | 3.22556300  |
| H | -0.25109100 | -0.65337800 | 4.62147800  |
| H | -0.39907800 | -3.09521900 | 4.99851400  |
| C | 6.27495300  | -0.63791900 | -0.76256700 |
| C | 5.12143000  | -0.29061200 | -1.69379700 |
| C | 3.80876300  | -0.97574800 | -1.29722600 |
| C | 4.60451400  | -0.95232100 | 1.13666400  |
| C | 5.89488000  | -0.27012400 | 0.66555900  |
| H | 4.96402900  | 0.79355700  | -1.67043400 |
| H | 5.34899600  | -0.56385100 | -2.72790200 |
| H | 6.51806000  | -1.70114000 | -0.83211900 |
| H | 7.17220800  | -0.09076800 | -1.06056800 |
| H | 5.75280800  | 0.81473300  | 0.72439100  |
| H | 6.69221300  | -0.53155900 | 1.36646300  |
| C | 3.84456000  | -2.47656000 | -1.62279100 |
| H | 3.05133500  | -2.99544200 | -1.08295600 |
| H | 3.67697200  | -2.61873000 | -2.69338800 |
| H | 4.79822500  | -2.94071800 | -1.37542800 |
| C | 2.66637300  | -0.33317100 | -2.08820700 |
| H | 2.83372800  | -0.46879100 | -3.15935400 |
| H | 1.70755500  | -0.78304800 | -1.82648500 |
| H | 2.61150900  | 0.73693400  | -1.87608300 |
| C | 4.83850700  | -2.44741100 | 1.39837600  |
| H | 5.41538800  | -2.56365000 | 2.31902700  |
| H | 3.88495000  | -2.96074200 | 1.52775000  |
| H | 5.39159300  | -2.93527000 | 0.59782100  |
| C | 4.16058000  | -0.29810600 | 2.44613400  |
| H | 3.28218200  | -0.79716300 | 2.85677600  |
| H | 4.96658800  | -0.35893300 | 3.18106100  |
| H | 3.91865800  | 0.75447700  | 2.28145300  |
| N | 3.55297500  | -0.66267200 | 0.13341900  |
| O | 2.37168100  | -1.34510700 | 0.54356200  |
| H | 1.67188600  | -0.66791100 | 0.48328500  |

## References.

- (1) *Purification of Laboratory Chemicals*; 6<sup>th</sup> ed.; Armarego, W.; Chai, C., Eds.; Elsevier: Oxford, 2009.
- (2) Berg, A.; Jakobsen, J. H.; S.R., J. *Acta Chem. Scand.* **1969**, *23*, 567.
- (3) Mukherjee, T. K. *J. Phys. Chem.* **1967**, *71*, 2277.



- (4) Hanif, M.; Ping, L.; Mao, L.; Yan, Z.; Zengh, Y.; Zengqi, X.; Yuguang, M.; Di, L.; Jinghong, L. *Polym. Internat.* **2007**, *56*, 1507.
- (5) Kato, S.; Hashimoto, H.; Hashimoto, J.; Arikawa, B.; Maeda, Y. *J. Synth. Org. Chem. Japan* **1957**, *15*, 32.
- (6) Rosenau, T.; Potthast, A.; Rohrling, J.; Hofinger, A.; Sixta, H.; Kosma, P. *Synth. Commun.* **2002**, *32*, 457.
- (7) McMaster, L.; Wobus, R. S. *J. Am. Chem. Soc.* **1934**, *56*, 164.
- (8) Linko, R. V.; Soldatkina, V. A.; Zaitsev, B. E.; Ryabov, M. A.; Sokol, V. I. *Russ. Chem. Bull.* **1999**, *48*, 1095.
- (9) Boulos, L. S.; Arsanious, M. H. N. *Synth. Commun.* **2002**, *32*, 2779.
- (10) Speier, G.; Tyeklár, Z.; Fülöp, V.; Párkányi, L. *Chem. Ber.* **1988**, *121*, 1685.
- (11) Frisch, M. J.; Trucks, G. W.; Schlegel, H. B.; Scuseria, G. E.; Robb, M. A.; Cheeseman, J. R.; Scalmani, G.; Barone, V.; Mennucci, B.; Petersson, G. A.; Nakatsuji, H.; Caricato, M.; Li, X.; Hratchian, H. P.; Izmaylov, A. F.; Bloino, J.; Zheng, G.; Sonnenberg, J. L.; Hada, M.; Ehara, M.; Toyota, K.; Fukuda, R.; Hasegawa, J.; Ishida, M.; Nakajima, T.; Honda, Y.; Kitao, O.; Nakai, H.; Vreven, T.; Montgomery, J. A.; Peralta, J. E.; Ogliaro, F.; Bearpark, M.; Heyd, J. J.; Brothers, E.; Kudin, K. N.; Staroverov, V. N.; Kobayashi, R.; Normand, J.; Raghavachari, K.; Rendell, A.; Burant, J. C.; Iyengar, S. S.; Tomasi, J.; Cossi, M.; Rega, N.; Millam, J. M.; Klene, M.; Knox, J. E.; Cross, J. B.; Bakken, V.; Adamo, C.; Jaramillo, J.; Gomperts, R.; Stratmann, R. E.; Yazyev, O.; Austin, A. J.; Cammi, R.; Pomelli, C.; Ochterski, J. W.; Martin, R. L.; Morokuma, K.; Zakrzewski, V. G.; Voth, G. A.; Salvador, P.; Dannenberg, J. J.; Dapprich, S.; Daniels, A. D.; Farkas; Foresman, J. B.; Ortiz, J. V.; Cioslowski, J.; Fox, D. J. Gaussian 09; Gaussian, Inc.: Wallingford, CT, 2009.
- (12) Y. Zhao and D. G. Truhlar, *Theor. Chem. Acc.*, **2008**, *120*, 215.
- (13) A. Schafer, C. Huber, R. Ahlrichs, *J. Chem. Phys.*, **1994**, *100*, 5829.
- (14) A. V. Marenich, C. J. Cramer, and D. G. Truhlar, *J. Phys. Chem. B*, **2009**, *113*, 6378.
- (15) S. Grimme, *J. Comp. Chem.*, **2006**, *27*, 1787.
